1 **Evolutionary proteomics uncovers ciliary signaling components**

2

3 Monika Abedin Sigg<sup>1</sup>, Tabea Menchen<sup>2</sup>, Jeffery Johnson<sup>3</sup>, Chanjae Lee<sup>4</sup>, Semil P. Choksi<sup>1</sup>, Galo  
4 Garcia 3<sup>rd,1</sup>, Henriette Busengdal<sup>5</sup>, Gerard Dougherty<sup>2</sup>, Petra Pennekamp<sup>2</sup>, Claudius Werner<sup>2</sup>,  
5 Fabian Rentzsch<sup>5</sup>, Nevan Krogan<sup>3,6</sup>, John B. Wallingford<sup>4</sup>, Heymut Omran<sup>2</sup> and Jeremy F.  
6 Reiter<sup>1\*</sup>

7

8 Affiliations

9 <sup>1</sup>Department of Biochemistry and Biophysics, Cardiovascular Research Institute, University of  
10 California, San Francisco, CA 94158, USA

11 <sup>2</sup>Department of General Pediatrics, University of Muenster, Muenster 48149, Germany

12 <sup>3</sup>Gladstone Institute of Cardiovascular Disease and Gladstone Institute of Virology and  
13 Immunology, San Francisco, CA 94158, USA

14 <sup>4</sup>Department of Molecular Biosciences, Center for Systems and Synthetic Biology and Institute  
15 for Cellular and Molecular Biology, University of Texas at Austin, Austin 78712, Texas

16 <sup>5</sup>Sars International Centre for Marine Molecular Biology, University of Bergen, Bergen 5008,  
17 Norway

18 <sup>6</sup>Department of Cellular and Molecular Pharmacology, University of California, San Francisco,  
19 CA 94158, USA

20 \*Correspondence: [Jeremy.Reiter@ucsf.edu](mailto:Jeremy.Reiter@ucsf.edu)

21

22

## 23 **ABSTRACT**

24 Cilia are organelles specialized for movement and signaling. To infer when during animal  
25 evolution signaling pathways became associated with cilia, we characterized the proteomes of  
26 cilia from three organisms: sea urchins, sea anemones and choanoflagellates. From these  
27 ciliomes, we identified 437 high confidence ciliary candidate proteins conserved in mammals,  
28 including known regulators of Hh, GPCR and TRP channel signaling. The phylogenetic profiles  
29 of their ciliary association indicate that the Hh and GPCR pathways were linked to cilia before  
30 the origin of bilateria and TRP channels before the origin of animals. We demonstrated that some  
31 of the candidates not previously implicated in ciliary biology localized to cilia and further  
32 investigated ENKUR, a TRP channel-interacting protein that we identified in the cilia of all three  
33 organisms. In animals, ENKUR is expressed by cells with motile cilia, ENKUR localizes to cilia  
34 in diverse organisms and, in both *Xenopus laevis* and mice, ENKUR is required for patterning  
35 the left/right axis. Moreover, mutation of *ENKUR* causes situs inversus in humans. Thus,  
36 proteomic profiling of cilia from diverse eukaryotes defines a conserved ciliary proteome,  
37 reveals ancient connections to Hh, GPCR and TRP channel signaling, and uncovers a novel  
38 ciliary protein that controls vertebrate development and human disease.

39

## 40 **INTRODUCTION**

41 The development of multicellular animals, involving complex cell movements, growth,  
42 patterning and differentiation, is orchestrated through intercellular communication. During and  
43 after development, some forms of cell-cell communications require cilia (Goetz and Anderson,  
44 2010). Similarly, certain forms of intercellular communication that occur among single-celled  
45 organisms, such as mating in the unicellular green alga *Chlamydomonas*, involve cilia (Pan and  
46 Snell, 2000; Solter and Gibor, 1977; Wang et al., 2006). In addition to sensing signals from other  
47 cells, cilia in both unicellular protozoa and multicellular animals can sense environmental stimuli  
48 such as light and chemical cues such as odors (Bloodgood, 2010; Malicki and Johnson, 2016).

49 Cilia and the related structures, flagella, are comprised of microtubular cores called  
50 axonemes that emanate from basal bodies and are ensheathed by membranes that are  
51 compositionally distinct from the contiguous plasma membrane

52 (Carvalho-Santos et al., 2011; Satir and Christensen, 2007). In animals, some types of  
53 cilia are motile and others immotile. Vertebrates use non-motile primary cilia for detecting

54 certain environmental stimuli and for intercellular communication, functions that require the  
55 localization of specific signal transduction machinery to cilia (Goetz and Anderson, 2010).  
56 Mammals use motile cilia and flagella for sperm locomotion and the generation of extracellular  
57 fluid flow (Satir and Christensen, 2007).

58 One critical role for motile cilia in many vertebrate embryos is in the specification of the  
59 left-right body axis. In mammals, motile cilia in the node, a cup-shaped structure on the ventral  
60 surface of the embryo, beat clockwise to generate a leftward flow that is required for left-right  
61 axis patterning (Marszalek et al., 1999; Nonaka et al., 1998; Supp et al., 1999). Motile cilia also  
62 clear lungs of mucous and debris, and circulate cerebrospinal fluid (Satir and Christensen, 2007).

63 Like primary cilia, motile cilia can also transduce signals required for animal  
64 development and adult tissue function. For example, cilia on human airway epithelial cells  
65 possess G-protein coupled receptors (GPCRs) that increase beat frequency in response to bitter  
66 compounds (Bloodgood, 2010; Shah et al., 2009). Cilia may also sense the leftward flow in left-  
67 right axis specification (McGrath et al., 2003).

68 Three signaling pathways associated with cilia are Hedgehog (Hh) signaling, some forms  
69 of GPCR signaling, and the activity of select Transient receptor potential (TRP) channels. The  
70 connections between cilia and Hh signaling, a critical regulator of embryonic development and  
71 adult homeostasis, are perhaps the best characterized, and many of the Hh signal transduction  
72 components localize to cilia (Goetz and Anderson, 2010). GPCRs that sense specific  
73 neurotransmitters and hormones also localize to neuronal primary cilia, suggesting that they have  
74 specific functions there (Hilgendorf et al., 2016). Similarly, TRP channel family members  
75 present in cilia regulate local calcium levels to modulate embryonic development (Delling et al.,  
76 2013).

77 Reflecting the diverse roles of cilia, ciliary defects cause a variety of human diseases with  
78 a wide range of manifestations, collectively called ciliopathies. Ciliopathy-associated phenotypes  
79 include retinal degeneration, polycystic kidney disease (PKD), skeletal malformations,  
80 bronchiectasis and left-right axis defects (Hildebrandt et al., 2011).

81 Because of the deep evolutionary conservation of cilia, the functions of cilia in single-  
82 celled organisms provide insights into the functions of animal cilia. For example, proteomic  
83 analysis of the *Chlamydomonas* flagellum and comparative genomics of ciliated and non-ciliated

84 organisms has helped define the ciliary parts list and identify the genetic causes of ciliopathies  
85 (Avidor-Reiss et al., 2004; Li et al., 2004; Pazour et al., 2005).

86 Unlike the extensive conservation of ciliary structural proteins between *Chlamydomonas*  
87 and humans, many ciliary signaling proteins, including most components of the Hh pathway, are  
88 not conserved beyond animals (Adamska et al., 2007). We hypothesized that comparisons of the  
89 ciliary proteomes of animals and their close relatives would reveal new components of ciliary  
90 intercellular signaling pathways and help elucidate how signaling and cilia became associated  
91 over animal evolution. To test this hypothesis, we selected three organisms phylogenetically  
92 positioned to reveal ancestral ciliary functions at critical steps throughout animal evolution: sea  
93 urchins, sea anemones, and choanoflagellates. Sea urchins, early-branching non-chordate  
94 deuterostomes with embryonic cilia that are used for motility and Hh signaling (Warner et al.,  
95 2013), can provide insights into the signaling pathways associated with cilia before the  
96 emergence of chordates. Sea anemones are cnidarians (non-bilaterians) and like sea urchins,  
97 possess highly ciliated embryos. Sea anemones can reveal ciliary proteins that were present in  
98 early-branching animals, before bilaterians arose. As the closest known relative of animals,  
99 choanoflagellates are well positioned to shed light on the evolutionary origin of metazoans.  
100 These flagellated protozoa can elucidate ciliary proteins that evolved before the emergence of  
101 animals.

102 We identified ciliary proteins from each of these organisms by isolating their cilia and  
103 analyzing them by mass spectrometry. Comparison of the ciliary proteomes, which we refer to as  
104 evolutionary proteomics, revealed a core, shared ciliary proteome and helped illuminate the  
105 ancestry of ciliary signaling proteins, uncovering ancient links between cilia and GPCR, Hh and  
106 TRP channel signaling pathways. Evolutionary proteomics also identified previously  
107 uncharacterized, evolutionarily ancient ciliary proteins conserved in mammals, including a  
108 protein called ENKURIN (ENKUR). We found that ENKUR is highly conserved among ciliated  
109 eukaryotes. ENKUR orthologs from diverse animal species and choanoflagellates localize to  
110 cilia, suggesting a conserved ciliary function. Functional characterization of ENKUR revealed  
111 that it is expressed in tissues with motile cilia and is required for left-right axis patterning in  
112 *Xenopus* and mice, but is dispensable for ciliary motility in the mouse respiratory tract.  
113 Furthermore, mutations in human *ENKUR* may cause inherited situs inversus, revealing that  
114 evolutionary analysis of organellar proteomes can provide insight into the etiology of disease.



115

## 116 **RESULTS**

### 117 **Ciliary proteomes of sea urchins, sea anemones and choanoflagellates**

118 To identify ciliary proteins conserved between animals and a close relative of animals,  
119 we isolated cilia from the sea urchin *Strongylocentrotus purpuratus*, the sea anemone  
120 *Nematostella vectensis*, and the choanoflagellate *Salpingoeca rosetta* (Figure 1A ). Sea urchins  
121 develop from triploblastic embryos that are covered with motile cilia (Figure 1B). Sea anemones  
122 develop from diploblastic embryos and, like sea urchins, have a highly ciliated larval stage.  
123 Choanoflagellate cells have a single, apical flagellum (Dayel et al., 2011).

124 For each of these three species, all of which possess mono-ciliated cells, we isolated cilia  
125 from developmental stages selected to increase the likelihood of identifying ciliary signaling  
126 proteins relevant to development. As sea urchin gastrula stage cilia are required for development  
127 (Warner et al., 2013), we used a high salt shock to amputate cilia from gastrula stage sea urchin  
128 embryos (Figure 1B) and separate deciliated embryos from the isolated cilia by differential  
129 centrifugation (Auclair and Siegel, 1966; Stephens, 1986). This method resulted in efficient  
130 separation of whole cilia, including the axoneme and ciliary membrane, from the basal body and  
131 the rest of the cell (Stephens, 1995). Immunofluorescent imaging and immunoblot analysis  
132 demonstrated that the ciliary fraction was highly enriched for the ciliary components  $\beta$ -Tubulin  
133 and acetylated Tubulin (TUB<sup>ac</sup>) and Actin, a non-ciliary protein, was undetectable (Figure 1C  
134 and D). To enhance the detection of stage-specific ciliary signaling proteins, we isolated cilia  
135 from sea urchin embryos at both early and late gastrulation stages. To enrich for signaling  
136 proteins which are often less abundant than structural and motor proteins, we separated the  
137 axonemes and their associated proteins from the non-axonemal portion, also called the  
138 “membrane plus matrix” fraction (Figure 2A) (Pazour et al., 2005; Witman et al., 1972). SDS-  
139 PAGE revealed unique banding patterns for each fraction, indicating successful separation  
140 (Figure 2B).

141 To isolate sea anemone cilia, we developed a deciliation protocol based on high salt  
142 shock. After separating cilia from sea anemone larvae of the planula stage (the stage that follows  
143 gastrulation) (Figure 1B), we purified the cilia by sucrose gradient centrifugation and  
144 fractionation. Fractions high in TUB<sup>ac</sup> contained little Actin and were comprised of intact cilia  
145 (Figure 1E and F).

146 We discovered that dibucaine, a compound used to isolate flagella from *Chlamydomonas*  
147 and *Tetrahymena*, caused choanoflagellate cells in rosette colonies to release their flagella  
148 (Thompson et al., 1974; Witman, 1986). In *Chlamydomonas*, dibucaine severs cilia distal to the  
149 basal body and transition zone (Sanders and Salisbury, 1994). After amputating flagella from  
150 colonial choanoflagellates (Figure 1B), we used sucrose gradient centrifugation and fractionation  
151 to separate microvilli and cell bodies from isolated cilia. Again, immunofluorescent imaging and  
152 immunoblot analysis revealed that the ciliary fraction was highly enriched for TUB<sup>ac</sup>, whereas  
153 the microvilli fraction was enriched for Actin (Figure 1G and H).

154 To identify the ciliary proteomes of these species, we analyzed the isolated cilia and  
155 flagella by mass spectrometry. We performed mass spectrometric protein profiling on  
156 unfractionated purified sea urchin cilia (whole cilia), the isolated axonemal fraction (axonemes)  
157 and the non-axonemal fraction (membrane plus matrix). Due to the tractability of obtaining large  
158 quantities of sea urchin cilia, we were able analyze cilia isolated from three separate embryo  
159 cultures at two different developmental stages. We separated the peptides from unfractionated  
160 whole cilia using two distinct methods of chromatography: pre-fractionated by hydrophilic  
161 interaction chromatography followed by C18 LC-MS/MS or LC-MS/MS using a high resolution  
162 C18 column and an extended reverse phase gradient. For the mass spectrometry data analyses,  
163 we chose a low-stringency cut-off to capture signaling proteins: proteins with a unique peptide  
164 count of 2 or more were included for future analysis (Table S1).

165 For isolated sea anemone cilia, we analyzed whole cilia from sucrose gradient fractions  
166 containing peak levels of TUB<sup>ac</sup> from two individual embryo cultures (Figure 1E, fractions 6 and  
167 7). As with the sea urchin, to further increase the diversity of peptides that we could identify, we  
168 separated peptides using the two distinct methods of chromatography described above.

169 To obtain a sufficient amount of material for mass spectrometry of choanoflagellate cilia,  
170 we performed two separate cilia preparations and pooled the samples before analysis. The  
171 sample was fractionated by high resolution reverse phase before mass spectrometry. To identify  
172 proteins selectively enriched in choanoflagellate flagella, we analyzed fractions containing cell  
173 bodies (fraction 1) and microvilli (fraction 10) alongside the ciliary fractions (fractions 4 and 5)  
174 (Figure 1G). We defined proteins with a ciliary fraction peptide count higher than that of the cell  
175 body and microvilli fraction as candidate members of the choanoflagellate ciliary proteome, or  
176 ‘ciliome’.

177 Metazoan developmental signaling pathways are proposed to have emerged with the  
178 advent of multicellularity or with major transitions in animal evolution (Pincus et al., 2008;  
179 Pires-daSilva and Sommer, 2003). Many signal transduction components are membrane-  
180 associated, suggesting that the membrane plus matrix fraction of sea urchin cilia would be  
181 enriched for signal transduction components relative to the axonemal fraction. Therefore, we  
182 calculated the degree of membrane plus matrix enrichment for each sea urchin protein by  
183 comparing its peptide count in the membrane plus matrix fraction to that of the axonemal  
184 fraction (Figure 2C and Table S2).

185 Comparing the data from the sea urchin whole cilia, axonemes and membrane plus matrix  
186 revealed that some proteins identified in ciliary fractions were not detected in the whole cilia  
187 data (Figure 2C), suggesting that fractionation increased the sensitivity of peptide detection.  
188 Conversely, a small subset of proteins detected in the early gastrula whole cilia fraction were not  
189 detected in the ciliary fraction, likely due to enrichment by hydrophilic interaction  
190 chromatography. All other sea urchin samples were analyzed exclusively by reverse phase  
191 chromatography. As expected, previously identified axonemal proteins (e.g., IFTs, motor  
192 proteins, Tektins) were enriched in the axonemal fraction (Figure 2C). Also as expected,  
193 previously identified ciliary membrane-associated proteins (e.g., PKD1, BBS3, RAB8A) were  
194 enriched in the membrane plus matrix fraction (Figure 2C). Moreover, membrane proteins not  
195 previously associated with cilia were enriched in the membrane plus matrix, including Dysferlin  
196 (DYSF), ATP-binding cassette, sub-family B (MDR/TAP), member 1A (ABCB1A), Transient  
197 receptor potential cation channel subfamily M member 3 (TRPM3).

198

### 199 **Definition of a conserved ciliome identifies novel ciliary proteins**

200 From the isolated cilia of three organisms, we identified peptides corresponding to over  
201 3,000 proteins in total (Table 1 and S1). As we are most interested in the evolution of ciliary  
202 signaling in the progression from the unicellular ancestors of animals to humans, we focused on  
203 those proteins with a homolog in mammals. BLAST identified 1,266 ciliome proteins with a  
204 homolog in mouse (Table 1 and S1), a set we termed the ‘conserved ciliome’. As expected based  
205 on their evolutionary distances to mammals, the sea urchin ciliome contains the greatest number  
206 of mammalian homologs (1,012), followed by the sea anemone (511) and choanoflagellate  
207 ciliomes (311), respectively (Table 1, Figure 3A).

208 As a first assessment of the ciliome, we compared the ciliary members of the SYSCILIA  
209 Gold Standard database, a list of well characterized proteins involved in cilia biology (van Dam  
210 et al., 2013), to each organism's ciliome. Of the SYSCILIA Gold Standard proteins present in  
211 cilia, 69% were present in the sea urchin ciliome (Tables 1 and S3). The sea anemone ciliome  
212 contained 55% of the SYSCILIA Gold Standard ciliary proteins and the choanoflagellate ciliome  
213 contained 41%. Previous ciliary proteomics or genomics studies identified less than half the  
214 number of the ciliary SYSCILIA Gold Standard members, suggesting that the ciliomes  
215 encompasses a large proportion of ciliary components (Avidor-Reiss et al., 2004; Ishikawa et al.,  
216 2012; Li et al., 2004; Mick et al., 2015; Ostrowski et al., 2002; Pazour et al., 2005).

217 437 mouse homologs were represented in at least two of the ciliomes, providing  
218 confidence that they represent bona fide ciliary components (Figure 3A, Table S1 highlighted in  
219 blue). To begin to assess whether this 'high-confidence ciliome' encompasses evolutionarily  
220 conserved ciliary components, we compared it to proteins implicated in ciliary biology by 19  
221 genomic, expression and proteomic studies in diverse unicellular and multicellular ciliated  
222 organisms (see Table S4 for list of studies and associated organisms) (Avidor-Reiss et al., 2004;  
223 Blacque et al., 2005; Boesger et al., 2009; Broadhead et al., 2006; Cao et al., 2006; Chen et al.,  
224 2006; Choksi et al., 2014; Efimenko et al., 2005; Ishikawa et al., 2012; Laurençon et al., 2007; Li  
225 et al., 2004; Liu et al., 2007; Mayer et al., 2008; Merchant et al., 2007; Mick et al., 2015; Narita  
226 et al., 2012; Ostrowski et al., 2002; Pazour et al., 2005; Smith et al., 2005). 76% of the high-  
227 confidence ciliome proteins has been previously implicated in ciliary biology (Table S1).

228 As the closest known living relative of animals, we hypothesized that choanoflagellate  
229 cilia would contain proteins conserved in mammals that are not present in the cilia of protozoa  
230 more distantly related to animals. To test this hypothesis, we compared the choanoflagellate  
231 ciliome to that of *Chlamydomonas reinhardtii*, the flagella of which have been well characterized  
232 by mass spectrometry (Pazour et al., 2005). We found that out of the 465 proteins in the  
233 choanoflagellate ciliome, 267 did not have a homolog in the *C. reinhardtii* ciliome (Table S3).  
234 Of the choanoflagellate ciliome proteins not present in the *C. reinhardtii* ciliome, over half (157  
235 proteins) had a homolog in the mouse, indicating that these protein are not unique to  
236 choanoflagellates and may represent ciliary proteins that emerged after the evolutionary  
237 divergence of *Chlamydomonas* from the lineage that would give rise to animals.

238 As a final test of whether the ciliomes represent a broad survey of ciliary components, we  
239 examined whether ciliopathy-associated proteins were identified in the conserved ciliome.  
240 Seventy-four of the conserved ciliome proteins are mutated in a ciliopathy, including 11 proteins  
241 associated with Bardet-Biedl-Syndrome (BBS), both proteins associated with autosomal  
242 recessive PKD, 13 proteins associated with short rib thoracic dysplasia, and 21 proteins  
243 associated with primary ciliary dyskinesia (PCD) (Table S1).

244 Thus, we hypothesized that high-confidence ciliome constituents not associated with  
245 ciliopathies are candidates that may explain the etiologies of orphan ciliopathies. For example,  
246 one high-confidence ciliome member, coiled-coil domain containing 63 (CCDC63), was recently  
247 identified as being essential for mouse sperm flagella formation, suggesting that it could be a  
248 ciliary protein linked to male fertility (Young et al., 2015). Other ciliome constituents may also  
249 indicate ciliary etiologies for syndromes not previously recognized as ciliopathies. For example,  
250 WD-repeat domain 65 (WDR65, also known as CFAP57), was identified in all three ciliomes  
251 and is associated with van der Woude syndrome, a craniofacial malformation with features  
252 similar to that of Orofaciodigital syndrome, a recognized ciliopathy (Rorick et al., 2011).

253 We also assessed whether these ciliomes have predictive power to identify previously  
254 undescribed ciliary components. C4orf22 (1700007G11Rik), C9orf116 (1700007K13Rik),  
255 C10orf107 (1700040L02Rik), MORN repeat containing 5 (MORN5), IQ motif containing D  
256 (IQCD), armadillo repeat containing 3 (ARMC3), UBX domain protein 11 (UBXN11), MYCBP  
257 associated protein (MYCBPAP), coiled-coil domain containing 96 (CCDC96), IQ motif and  
258 ubiquitin domain containing (IQUB), EF hand calcium binding domain 1 (EFCAB1), DPY30  
259 domain containing 1 (DYDC1) all prominently localize to the multicilia of fallopian tube cells,  
260 suggesting that they may be previously unrecognized components of motile cilia (Uhlén et al.,  
261 2015). We expressed LAP-tagged versions of select candidates and assessed their localization in  
262 IMCD3 cells. C4orf47 (1700029J07Rik), for example, localizes to cytoplasmic microtubules and  
263 cilia (Figure 3B). Others, including Coiled-coil domain containing 113 (CCDC113) and Casein  
264 kinase 1δ (CSNK1D) localized predominantly to the base of cilia (Figure 3B).

265 Many proteins in the high-confidence ciliome are known to localize to and function  
266 within mammalian cilia, but others, like C4orf47, have not previously been identified as ciliary  
267 proteins. To estimate what proportion of proteins in the high-confidence ciliome are bona fide  
268 ciliary proteins in mammals, we randomly selected 49 proteins from the high-confidence ciliome

269 and tested if the GFP-tagged human homolog localized to cilia of IMCD3 cells (Table S5). We  
270 also tested the localization 30 randomly selected human proteins not identified in the ciliome.  
271 Based on proportion of the human genome encoding known ciliary proteins, we expected that 1-  
272 3 proteins would localized to cilia. Four of the randomly selected proteins localized to cilia  
273 (Figure S1A), suggesting that the test is specific. Of the 49 randomly selected candidate ciliary  
274 proteins, 10 localized to the cilium or the ciliary base (Figure 3C and S1B). Included in the 49  
275 proteins were 8 SYSCILIA Gold Standard proteins, one of which localized to cilia, indicating  
276 that this test is not sensitive. Based on the proportion of candidate ciliary proteins that localized  
277 to cilia and the low sensitivity of the localization assay, greater than 20% of the proteins in the  
278 high-confidence ciliome are likely to localize to human cilia.

279 We hypothesized that some proteins in the ciliome localize specifically to motile cilia,  
280 and not to primary cilia. To test this hypothesis, we determined whether proteins that did not  
281 localize to IMCD3 primary cilia can localize to the motile cilia of the zebrafish Kupffer's  
282 vesicle. CCDC37 (CFAP100) and PIN1, two proteins that did not localize to primary cilia in  
283 IMCD3 cells, localized to motile cilia of the zebrafish embryo (Figure 3D and S1C). Unlike  
284 CCDC37, PIN1 localized to some, but not all primary cilia in the zebrafish embryo. Conversely,  
285 CCDC170 localized to the base of primary cilia in IMCD3 cells and in the zebrafish embryo, but  
286 did not localize to the motile cilia of Kupffer's vesicle. These data reveal that some proteins  
287 localize specifically to either motile or primary cilia.

288

### 289 **Comparison of evolutionarily diverse ciliomes identifies signaling proteins**

290 Many ciliary components show a taxonomic distribution consistent with being present in  
291 the last common eukaryotic ancestor and lost from organisms that have lost cilia, such as many  
292 plants and fungi (Li et al., 2004). To test whether components of the sea urchin, sea anemone and  
293 choanoflagellate ciliomes display a taxonomic distribution paralleling the distribution of cilia, we  
294 used a computational algorithm, CLustering by Inferred Models of Evolution (CLIME), to map  
295 proteins onto a phylogeny that includes prokaryotes and 136 ciliated and unciliated eukaryotes  
296 (Li et al., 2014). 15% of ciliome components displayed a taxonomic distribution closely  
297 mirroring the presence of cilia (Figure 4A, S2 and Table S6). In addition to many recognized  
298 ciliary components, such as IFT and BBSome, high-confidence ciliome components, such as  
299 ENKUR, TRPM3, Zinc finger MYND-type containing 12 (ZMYND12) and Sperm tail PG rich



300 repeat containing 2 (STPG2) showed distributions consistent with co-evolving with cilia. The  
301 presence of these genes in the genomes of diverse ciliated eukaryotes suggests that they may  
302 have evolutionarily ancient functions in cilia.

303 To trace the ancestry of known ciliary signaling pathways, we also examined whether  
304 previously identified components of these pathways were present in the sea urchin, sea anemone  
305 and choanoflagellate ciliomes. Choanoflagellate genomes do not contain genes for most Hh  
306 pathway components, suggesting that they do not use Hh signaling for intercellular  
307 communication (King et al., 2008). Analysis of whether ciliary Hh pathway components were  
308 present in the sea urchin and sea anemone ciliomes revealed that, although canonical Hh  
309 pathway proteins such Patched1, Smoothed, and the GLIs were not detected, both positive  
310 regulators of ciliary Hh signaling, such as Casein Kinase 1 isoform  $\gamma$  (CK1 $\gamma$ ) (Li et al., 2016) and  
311 negative regulators of ciliary Hh signaling, such as TULP3 (Chávez et al., 2015; Garcia-Gonzalo  
312 et al., 2015; Li et al., 2016; Mukhopadhyay et al., 2013) were detected (Figure 4B). Similarly, we  
313 detected Ellis van Creveld protein 2 (EVC2) and a homolog of EVC in the sea urchin ciliome. In  
314 mammals, EVC and EVC2 localize to the proximal cilium and act as tissue-specific positive  
315 regulators of the Hh pathway (Caparrós-Martín et al., 2013; Dorn et al., 2012; Yang et al., 2012).  
316 Mutations in the genes that encode these proteins cause Ellis–van Creveld syndrome and Weyers  
317 acrofacial dysostosis, ciliopathies characterized by skeletal and craniofacial defects and  
318 polydactyly (Ruiz-Perez et al., 2000; Ye et al., 2006). Two EVC and EVC2 interacting proteins,  
319 IQ domain-containing protein E (IQCE) and EF-hand calcium binding domain-containing  
320 protein 7 (EFCAB7), regulate Hh signaling by anchoring EVC and EVC2 to the proximal cilium  
321 (Pusapati et al., 2014). IQCE was present in the sea urchin ciliome and EFCAB7 was present in  
322 the sea anemone ciliome.

323 In addition to EVC and EVC2, we identified two paralogs, EVC3.1 and EVC3.2  
324 (Pusapati et al., 2014), in the choanoflagellate, sea anemone and sea urchin ciliomes (Figure 4B).  
325 The presence of EVC3 in the ciliomes suggests that the association between cilia and the EVC  
326 family extends beyond metazoans to early-branching eukaryotes. As EVC3.1 and EVC3.2 are  
327 missing from the genomes of some mammals, including humans, it appears that, whereas  
328 mammals have preserved much of the ciliary repertoire of basal organisms, some have  
329 selectively lost at least two ciliary proteins.

330 Several of the largest class of receptors, GPCRs, localize to cilia. For example, odorant  
331 receptors act at olfactory epithelia cilia (Goetz and Anderson, 2010). We identified four GPCRs  
332 that have mouse homologs, none of which have been previously reported in cilia (Figure 4B).  
333 Other members of the GPCR signaling pathway, including G proteins, Arrestins and GPCR  
334 kinases (GRKs), were identified in both the sea urchin and sea anemone ciliomes, suggesting that  
335 not just GPCRs, but GPCR signal transduction has an ancient evolutionary connection to cilia  
336 that precedes the advent of bilateria.

337 To assess whether some of the identified GPCR signaling proteins can localize to  
338 mammalian cilia, we expressed a GFP-tagged version of a sea urchin homolog of Opioid  
339 receptor  $\mu 1$  (OPRM1) that we named OPRM1L in RPE-1 cells and found that it localized to cilia  
340 (Figure S3A). The GPCR signal transduction component  $\beta$ -Arrestin-1/2 can localize to one end  
341 of cilia (Pal et al., 2016). As  $\beta$ -Arrestin-1 (ARRB1) was detected in the sea urchin ciliome, we  
342 also examined the localization of sea urchin ARRB1-GFP in RPE-1 cells and found that, like the  
343 mammalian ortholog, it was enriched at one ciliary end (Figure S3B).

344 Unlike Hh and GPCR signaling proteins, TRP channels and TRP channel-associated  
345 protein were detected in all three ciliomes (Figure 4B). PKD family members, previously known  
346 to localize to cilia, were present in sea anemone and sea urchin cilia, as was TRPM3, a channel  
347 that has multiple proposed functions, including heat sensation (Held et al., 2015). A homolog of  
348 TRPM2 was identified in the choanoflagellate cilia, suggesting that the association of TRP  
349 channels with cilia arose before the emergence of animals. Also, Enkurin (ENKUR), a TRP  
350 channel interacting protein (Sutton et al., 2004), was detected in the ciliomes of all three  
351 organisms and the Enkurin domain-containing protein, ENKD1, was detected in the sea anemone  
352 ciliome. ENKUR was originally identified as a TRP channel interactor expressed by sperm  
353 (Sutton et al., 2004). The identification of ENKUR orthologs in choanoflagellate, sea anemone  
354 and sea urchin ciliomes suggests a conserved ciliary function. As evolutionary conservation is  
355 associated with increased likelihood of affecting fitness and disease (Hirsh and Fraser, 2001;  
356 Wan et al., 2015), we hypothesized that ENKUR may have important biological functions in  
357 animals.

358

359 **ENKUR is a ciliary protein critical for left-right axis specification in *Xenopus* and mice**



360 From the analysis of cilia of diverse organisms, we sought to uncover conserved proteins  
361 whose functions in ciliary biology had been unappreciated. As mammalian ENKUR has been  
362 detected at the sperm flagellum (Sutton et al., 2004), we wondered if ENKUR had functions in  
363 cilia and if those functions were conserved in earlier branching animals. In addition to  
364 identifying ENKUR in the ciliomes of choanoflagellates, sea anemones and sea urchins we found  
365 *Enkur* in the genome of diverse ciliated eukaryotes suggesting that it may have an evolutionarily  
366 ancient function in cilia (Figure S4).

367 To determine where in the invertebrate embryo *Enkur* is expressed we used in situ  
368 hybridization to identify *Enkur* expression in sea anemone and sea urchin embryos throughout  
369 gastrulation. In sea anemone embryos, early in gastrulation, *Enkur* was expressed in most cells,  
370 with higher expression in a subset of cells distributed throughout the embryo (Figure 5A and  
371 S5A). Midway through gastrulation and into the late gastrula stage, *Enkur* expression was  
372 maintained in the ectoderm and became enriched at the aboral end of the sea anemone embryo,  
373 coincident with the apical organ, a group of cells that bear long cilia (termed the “ciliary tuft”)  
374 and is hypothesized to have sensory function (Rentzsch et al., 2008).

375 In the sea urchin embryo, *Enkur* is expressed in all cells from the mesenchyme blastula  
376 stage, throughout gastrulation and into the prism stage, with peak expression during gastrulation.  
377 Strikingly, in early gastrulation, *Enkur* expression is enriched at the apical end of the embryo  
378 where the ciliary tuft is located (Figure 5B and S5B). The expression pattern of *Enkur* in sea  
379 urchin and sea anemone embryos suggests a conserved function for ENKUR in the ciliary tuft  
380 that extends from early-branching eumazoans (all animals except sponges and placozoans) to  
381 dueterostomes.

382 To determine if, as in the sea urchin and sea anemone, *Enkur* is expressed in motile  
383 ciliated cells in vertebrate embryos, we used in situ hybridization to examine its expression in  
384 *Xenopus laevis* embryos. We found that *Enkur* is expressed in motile ciliated cells distributed  
385 throughout the epidermis (Figure 5C). In mouse, we confirmed by quantitative PCR that *Enkur* is  
386 expressed exclusively in mouse tissues that possess motile cilia, such as the testes and trachea  
387 (Figure 5D and (Sutton et al., 2004)).

388 To begin to assess the subcellular localization of sea urchin, sea anemone and  
389 choanoflagellate ENKUR, we GFP-tagged ENKUR and analyzed its localization in ciliated  
390 mammalian cells. We found that GFP-tagged sea urchin and choanoflagellate ENKUR proteins

391 localized to cilia if expressed in mammalian cells (Figure 5E and F). To determine if ENKUR  
392 localizes to cilia in vertebrates, we expressed GFP-ENKUR in *X. laevis* embryos and found that  
393 it localized to the epidermal cell motile cilia (Figure 5G). Similarly, mouse ENKUR localized to  
394 the motile cilia of tracheal epithelial cells (Figure 5H and S5C) and the mammalian ortholog of  
395 an ENKUR-related protein, ENKD1, localized predominantly to the base of cilia (Figure  
396 S5D). To further analyze ENKUR expression in the mouse, we utilized *Enkur*<sup>-/-</sup> mice. Western  
397 blot corroborated the ENKUR immunofluorescent staining, indicating that the protein is  
398 expressed in trachea, and is absent from the trachea of *Enkur*<sup>-/-</sup> mice (Figure 5I).

399 In mammals, specification of the left-right axis requires both ciliary motility and PKD2-  
400 dependent ciliary signaling (McGrath et al., 2003; Nonaka et al., 1998; Pennekamp et al., 2002;  
401 Yoshiba et al., 2012). PKD2, a member of the TRP family of ion channel proteins, forms a  
402 ciliary complex with PKD1. A homologs of PKD1 was detected in the ciliome of sea urchin and  
403 an ortholog of PKD2 was detected in the ciliome of sea anenomes (Figure 4B). The localization  
404 of ENKUR to motile ciliated cells of diverse organisms, as well as its connection to TRP  
405 channels, led us to hypothesize that it might play a role in left-right axis patterning. In *Xenopus*,  
406 left-right patterning requires leftward flow generated by motile cilia on the gastrocoel roof plate  
407 (GRP) to induce genes such as *Pitx2c* specifically in the left lateral plate mesoderm (Schweickert  
408 et al., 2010). In situ hybridization revealed that *Enkur* expression is restricted to the GRP in stage  
409 17 embryos and ENKUR-GFP localized to the cilia of GRP cells (Figure 6A and B).

410 To determine if ENKUR function is required for establishing the left-right axis, we  
411 inhibited *Enkur* expression using a morpholino (Figure S5E). Whereas 95% of control embryos  
412 displayed *Pitx2c* in the left lateral plate mesoderm, *Pitx2c* expression was absent in 76% of  
413 *Enkur* morphants, suggesting that ENKUR is required for left-right axis patterning in *X. laevis*  
414 (Figure 6C and D).

415 The left-right axis defect in *Enkur* morphant *Xenopus* led us to investigate if the  
416 requirement for ENKUR in left-right patterning was conserved in mammals. We examined the  
417 developmental expression of mouse *Enkur* by situ hybridization, which revealed that, similar to  
418 *X. laevis*, 2-4 somite stage mouse embryos express *Enkur* exclusively in the node (Figure 6E and  
419 S5F). Immunofluorescent staining indicated that, again like *X. laevis*, ENKUR localizes to nodal  
420 cilia, suggesting that mouse ENKUR may function in mouse left-right patterning (Figure 6F).

421 We analyzed visceral organ placement in adult *Enkur*<sup>-/-</sup> mice and found that 26%  
422 displayed abnormal situs (Figure 6G and H). Half of the affected mice had situs inversus totalis,  
423 a complete reversal of the left-right axis, and half displayed situs ambiguus, a variably abnormal  
424 positioning of organs that includes misorientation of the heart, right-sided stomach or spleen,  
425 asplenia, left-sided liver, and abnormal hepatic lobulation. Embryos that lack nodal cilia or have  
426 non-motile nodal cilia exhibit a higher incidence of abnormal situs than do *Enkur*<sup>-/-</sup> embryos  
427 (Nonaka et al., 1998; Takeda et al., 1999). The presence of left-right axis defects in a minority of  
428 *Enkur*<sup>-/-</sup> mice indicates that axis specification is not entirely randomized in the absence of  
429 ENKUR function.

430 An early event in left-right axis specification is the generation of leftward flow by nodal  
431 cilia which activates Nodal signaling specifically in the left lateral plate mesoderm (Collignon et  
432 al., 1996; Lowe et al., 1996; Saijoh et al., 2003). To determine if ENKUR participates in this step  
433 in left-right axis patterning, we examined the expression of *Lefty2*, a Nodal target gene (Meno et  
434 al., 1996). In situ hybridization revealed that in *Enkur*<sup>-/-</sup> embryos, *Lefty2* expression in the lateral  
435 plate mesoderm was bilateral, and variably enriched on the left or right side (Figure 6I),  
436 indicating that ENKUR functions in an early step in left-right axis specification.

437 To test if ENKUR is acting upstream of the Nodal signaling pathway in left-right axis  
438 patterning, we analyzed the expression of *Cerberus like-2* (*Cerl2*), a secreted protein that  
439 antagonizes Nodal (Marques, 2004). In response to nodal fluid flow, *Cerl2* is downregulated on  
440 the left side of the node (Nakamura et al., 2012). In contrast to littermate control embryos, *Enkur*<sup>-/-</sup>  
441 embryos displayed equal, bilateral expression of *Cerl2*, suggesting that ENKUR may be acting  
442 before Nodal signaling is activated, perhaps by generating or sensing leftward nodal flow (Figure  
443 6J).

444 One model of nodal flow sensation contends that there are two types of monocilia present  
445 at the node: motile cilia of nodal pit cells generate flow and crown cell cilia on the periphery of  
446 the node detect the flow to distinguish left from right (Babu and Roy, 2013; McGrath et al.,  
447 2003). To investigate whether *Enkur* is expressed in one or both types of nodal cells, we  
448 examined *Enkur* expression in sectioned 2-4 somite stage embryos. *Enkur* was expressed by  
449 nodal pit cells but absent or only weakly expressed by crown cells (Figure 6K). The predominant  
450 expression of *Enkur* by pit cells suggests that ENKUR may contribute to leftward flow.

451

## 452 **Mutation of human *ENKUR* affects left-right axis specification**

453 A hallmark of human ciliopathies affecting nodal cilia is situs inversus (Afzelius, 1976).  
454 We identified a consanguineous Azerbaijani kindred with two progeny that display situs inversus  
455 totalis (Figure 7A and B, S5G). Notably, neither affected individual exhibited recurrent airway  
456 infections or bronchiectasis, hallmarks of primary ciliary dyskinesia (PCD). Homozygosity  
457 mapping of the mother (OP-1605 I2) and one affected individual (OP-1605 II3) identified a short  
458 segment of homozygosity by descent on chromosome 10 containing *ENKUR* (Figure 7C). Whole  
459 exome sequencing of one affected sibling (OP-1605 II3) excluded previously identified  
460 mutations in all genes causative for PCD and heterotaxia but identified a homozygous variant,  
461 c.224-1delG, that alters the splice acceptor site of the second *ENKUR* intron (Figure 7D, Table  
462 S7). Sanger sequencing confirmed that this variant co-segregated with the phenotype and showed  
463 a recessive pattern of inheritance in the kindred (Figure 7E). Together, these data suggest that  
464 homozygous mutations in *ENKUR* are a cause of situs inversus in humans.

465 To assess the effect of the homozygous mutation on *ENKUR*, we examined the motile  
466 cilia of nasal epithelial cells isolated from the respiratory tracts of both affected individuals and  
467 an unaffected control. We found that human *ENKUR* localizes to nasal epithelial cilia (Figure  
468 7F). In contrast, neither individual with situs inversus exhibited ciliary localization of *ENKUR*  
469 (Figure 7F), suggesting that the human mutation abrogates *ENKUR* expression.

470 To determine whether *ENKUR* affects the localization of other ciliary proteins associated  
471 with situs inversus, we analyzed their localization in human nasal epithelia cells of an *ENKUR*  
472 mutant individual. Outer dynein arm (ODA) complex components DNAH5 and DNAH11, the  
473 ODA-docking complex component CCDC151, the inner dynein arm component DNALI1, the  
474 nexin-dynein regulatory complex component GAS8, the axonemal components CCDC11 and  
475 CCDC39, and the radial spoke component RSPH9 (Dougherty et al., 2016; Fliegau et al., 2005;  
476 Hjeij et al., 2014; Kastury et al., 1997; LeDizet and Piperno, 1995; Merveille et al., 2011;  
477 Olbrich et al., 2015) all localized equivalently to the cilia of wild type control and homozygous  
478 *ENKUR* mutant cells (Figure S6). Likewise, *ENKUR* localized normally in human nasal  
479 epithelial cells from PCD-affected individuals with mutations in *CCDC40*, *CCDC11* or *DNAAF2*  
480 (Becker-Heck et al., 2011; Omran et al., 2008a) (Figure S7). Thus, *ENKUR* and several proteins  
481 associated with situs inversus are mutually dispensable for each other's localization to cilia.

482 As neither homozygous *ENKUR* mutant individual exhibited the respiratory  
483 manifestations of PCD, we analyzed the motility of their nasal epithelial cell cilia. The cilia of  
484 both individuals with situs inversus displayed coordinated, wavelike beating, comparable to  
485 those of unaffected control individuals (Supplemental video S1 and S2). The ciliary beat  
486 frequencies of the affected individuals were  $5.7 \pm 3.8$  Hz and  $5.6 \pm 1.3$  Hz, within the normal range  
487 (Raidt et al., 2014) (Table S8). Whereas individuals with disrupted ciliary motility produce  
488 reduced levels of nasal nitric oxide (Lundberg et al., 1994), the nasal nitric oxide production  
489 rates of the two individuals with situs inversus were 155 ml/min and 234 ml/min, exceeding the  
490 77 ml/min production rate below which is consistent with PCD (Table S8). According to these  
491 measures, the respiratory ciliary function of both individuals with homozygous *ENKUR*  
492 mutations was normal.

493 To determine if, like humans, *ENKUR* is dispensable for ciliary motility in the  
494 respiratory tract of mice, we analyzed airway cilia of *Enkur*<sup>-/-</sup> mice. We analyzed the beating of  
495 cilia on tracheal epithelial cells of *Enkur*<sup>-/-</sup> mice and discovered that, like humans, the motility of  
496 mutant cilia was not distinguishable from wild type (Supplemental video S3 and S4).

497 Together, these data demonstrate that *ENKUR* is a highly conserved ciliary protein that is  
498 not required for ciliary motility in the airway, but that is required for left-right axis determination  
499 in *Xenopus* and mice. Furthermore, when mutated, *Enkur* may be a cause of situs inversus in  
500 humans.

501

## 502 **DISCUSSION**

503 Communication of environmental or intercellular information is a critical function of the  
504 cilia of organisms from diverse phyla throughout Eukarya. In vertebrates, the signaling functions  
505 of cilia are especially important for sight, olfaction and development. At what points in animal  
506 evolution did different signaling pathways become associated with cilia? Whereas the structural  
507 proteins that make up cilia are conserved among most ciliated Eukaryotes, including humans,  
508 few metazoan signaling proteins are conserved outside of the animal kingdom. Therefore, we  
509 identified ciliary proteins from organisms representing major steps in animal evolution:  
510 choanoflagellates, whose phylogenetic position informs the origin of multicellular animals, sea  
511 anemones, radially symmetric sister group to bilaterally symmetric animals, and sea urchins,  
512 basal Deuterostomes that provide insights into the ancestor of chordates.

513           The ciliomes indicate that proteins involved in GPCR and Hh signaling were associated  
514 with cilia before bilateria arose and TRP channels were associated with cilia before the  
515 emergence of animals. Many of the identified proteins with homologs in mammals, the  
516 conserved ciliome, had a phylogenetic distribution paralleling the presence of cilia: present in  
517 ciliated organism of the Animal, Plant, Fungi and Protist kingdoms but lost from unciliated  
518 organisms within these groups. These ciliary proteins are therefore likely to have been present in  
519 the last common ancestor of all extant eukaryotes, a ciliated organism.

520           One protein that we identified in the ciliomes of choanoflagellates, sea anemones and sea  
521 urchins, suggesting that it became associated with ciliary function before the emergence of  
522 animals, was ENKUR, a highly conserved protein found in diverse ciliated eukaryotes. We found  
523 that *Enkur* is expressed in tissues with motile ciliated cells, including those with single cilia (*i.e.*,  
524 *Xenopus* and mouse nodal cells, sea anemone and sea urchin embryonic epithelial cells) and  
525 those with multiple cilia (*i.e.*, mouse tracheal epithelial cells, *Xenopus* embryonic epidermal  
526 cells). In addition, ENKUR from animals and choanoflagellates localizes to cilia, raising the  
527 possibility that it acts within cilia to generate or respond to fluid flow. Mutation of *Enkur* in the  
528 mouse did not compromise ciliary beat frequency in tracheal epithelial cells, indicating that,  
529 unlike many ciliary proteins with expression patterns and phylogenetic distributions similar to  
530 ENKUR (*e.g.*, outer arm dyneins), it is not essential for ciliary motility. Instead, ENKUR is  
531 required for patterning of the left-right axis in both *Xenopus* and mouse, suggesting that it is  
532 required for some aspect of ciliary beating or signaling in the embryonic node. Significantly,  
533 humans with a homozygous mutation in *ENKUR* displayed inversion of their left-right axis, but  
534 no signs of defective mucociliary clearance, suggesting that human *ENKUR* loss of function does  
535 not cause PCD, but may be a cause situs inversus.

536           ENKUR has previously been shown to interact with TRP channels and calcium signaling  
537 proteins, suggesting that it may bridge the gap between TRP channels and downstream signaling  
538 components (Sutton et al., 2004). Calcium signaling and the ciliary TRP channel PKD2 have  
539 been implicated in left-right axis patterning, although their exact roles remain unclear (McGrath  
540 et al., 2003; Pennekamp et al., 2002; Yoshida et al., 2012). In the sea urchin, PKD2 is expressed  
541 at the tip of the archenteron (Tisler et al., 2016), where we find *Enkur* to also be expressed. The  
542 archenteron tip possesses motile cilia that beat rotationally, similar to cilia of the node, although  
543 how cilia in sea urchin left-right axis patterning function remains a subject of investigation



544 (Tisler et al., 2016; Warner et al., 2016). PKD2 has also been shown to be expressed in the  
545 ciliary tuft of sea urchin embryos, a structure hypothesized to have sensory function (Tisler et al.,  
546 2016). We found that, like PKD2, *Enkur* mRNA is enriched in the cells of both the sea urchin  
547 and sea anemone ciliary tuft. It will be of great interest to assess whether ENKUR regulates or  
548 interprets calcium responses in nodal, archenteron or tuft cilia.

549 In addition to ENKUR, we identified 130 other proteins in the ciliomes of all three  
550 organisms examined here. As expected, these proteins included many recognized to have  
551 evolutionarily ancient ciliary roles, including structural components (*e.g.*, Tektin-1,  $\beta$ -Tubulin),  
552 intraflagellar transport (*e.g.*, IFT57, IFT80, IFT81, IFT122, IFT172) and ciliary movement (*e.g.*,  
553 axonemal dyneins, Nexin-Dynein regulatory complex components, radial spoke proteins,  
554 SPAG17, HYDIN). Other highly conserved ciliary proteins, such as components of the transition  
555 zone and basal body, were not detected as our methods amputated cilia distal to the basal bodies  
556 and transition zones (Sanders and Salisbury, 1994; Stephens, 1995). Similarly, we did not detect  
557 ciliopathy-associated proteins that are not ciliary components, such as those PCD-associated  
558 proteins that function within the cytoplasm to assemble dynein arms (Kott et al., 2012; Loges et  
559 al., 2009; Mitchison et al., 2012; Omran et al., 2008b). Like ENKUR, we predict that many of  
560 the uncharacterized or poorly characterized proteins present in the ciliomes of all three  
561 organisms (*e.g.*, C9orf116, C4orf22, C10orf107, C5orf49) will localize to cilia and have ciliary  
562 functions.

563 The sea anemone and sea urchin ciliomes share 250 proteins not identified in the  
564 choanoflagellate ciliome. Some of these proteins, such as EVC2, have functions associated with  
565 Hh signaling, a pathway present in many multicellular animals including sea anemones and sea  
566 urchins but absent, at least in its canonical form, from choanoflagellates (Adamska et al., 2007).  
567 EVC2 is part of a complex comprised of four proteins, EVC, EVC2, IQCE and EFCAB7, each of  
568 which were detected in at least one ciliome (Pusapati et al., 2014). Orthologs of the genes  
569 encoding these proteins are not present in the choanoflagellate genome, suggesting that they  
570 emerged during animal evolution in parallel with the development of ciliary Hh signaling.

571 In addition to EVC and EVC2, we identified a structurally related protein called EVC3 in  
572 the ciliomes of sea urchins, sea anemone and choanoflagellates. The phylogenetic distribution of  
573 the EVC complex components and EVC3 suggests that EVC3 may represent an ancestral ciliary  
574 protein, with EVC and EVC2 emerging in multicellular animals as regulators of Hh signaling

575 (Pusapati et al., 2014). The identification of EVC3 proteins in cilia suggests that EVC proteins  
576 likely have ancient functions at cilia where EVC3 presumably had Hh-independent functions.

577 Other known ciliary proteins such as TULP3, a regulator of Hh signaling, were identified  
578 exclusively in the sea urchin ciliome. Although homologs of TULPs are present in the genomes  
579 of both choanoflagellates and sea anemones, an ortholog of TULP3 is missing, suggesting that  
580 the TULP family expanded in animals and TULP3 may be a Deuterostome innovation.

581 Beyond Hh signaling components, we detected proteins involved in other pathways, such  
582 as GPCR signaling, in the ciliomes of both sea anemones and sea urchins. Homologs of four  
583 mouse GPCRs were present in the sea urchin or sea anemone ciliome. In addition to GPCRs,  
584 orthologs of multiple G protein components were identified in these ciliomes, including GNAS,  
585 GNAQ, GNAO1 and GNB2. The roles of the G protein Transducin in phototransduction at the  
586 photoreceptor outer segment (a modified cilium) and of the G protein GNAL in olfaction at the  
587 cilia of olfactory sensory neurons are well appreciated (Giebl et al., 2004; Kuhlmann et al.,  
588 2014). The identification of multiple G proteins in the ciliomes of sea anemones and sea urchins  
589 suggests that their association with cilia arose early in animal evolution. The co-existence of  
590 GPCR and Hh signaling proteins in cilia of early-branching animals may have facilitated the  
591 evolution of crosstalk between the two pathways, exemplified by the involvement of the GPCR  
592 GPR161,  $\beta$ -Arrestins and GRKs in mammalian Hh signal transduction (Chen et al., 2011; Evron  
593 et al., 2011; Mukhopadhyay et al., 2013; Pal et al., 2016). As the ciliomes contained previously  
594 identified members of Hh, GPCR and TRP channel signaling, we hypothesize that they also  
595 contained unrecognized ciliary regulators of these signaling pathways.

596 The ciliomes identified 73 proteins encoded by genes that, when mutated, cause human  
597 ciliopathies such as PCD (*e.g.*, *HYDIN*, *CCDC39*, *TTC25*), Bardet-Biedl syndrome (*e.g.*, *BBS1*,  
598 *BBS2*, *BBS3/ARL6*), retinal degeneration (*e.g.*, *LCA5*, *ARL3*, *CLUAP1*) and nephronophthisis  
599 (*e.g.*, *DCDC2A*, *TRAF3IP1*) (Hildebrandt et al., 2011). Another 241 genes represented in these  
600 ciliomes are associated with human diseases with no established connection to cilia. Perhaps  
601 some of these diseases are caused by defects in cilia, as discussed for WDR65 and van der  
602 Woude syndrome, above. Beyond WDR65, we identified RAB28 in the sea anemone ciliome,  
603 mutations in which are associated with a form of retinitis pigmentosa called progressive rod-cone  
604 dystrophy 18 (Cord18) (Roosing et al., 2013). Therefore, we hypothesize that Cord18 is caused  
605 by RAB28-associated dysfunction of the photoreceptor outer segment. Similarly, we identified



606 NEK9, in the ciliome, which is linked to a form of skeletal dysplasia recently proposed to be a  
607 ciliopathy (Casey et al., 2016). We predict that, like ENKUR and situs inversus, other ciliome  
608 members identified here will prove to underlie orphan ciliopathies.

609         The identification of an extensive compilation of ciliary proteins from organisms at key  
610 phylogenetic nodes has shed light on the evolutionary history of ciliary signaling proteins,  
611 suggesting that ciliary signaling pathways, such as Hh and GPCR signaling, evolved before the  
612 emergence of Bilaterians or, in the case of TRP channel signaling, before the emergence of  
613 animals. Using evolutionary proteomics, we identified previously uncharacterized ciliary  
614 proteins, including ENKUR, which our data suggest may underlie a human disease,  
615 demonstrating promise for further studies of ciliome members and for future applications of  
616 evolutionary proteomics. The use of the ciliomes to identify an evolutionarily conserved function  
617 for ENKUR illustrates how a protein's evolutionary association with an organelle can help  
618 elucidate its function.

619         Our cilia proteomics approach has provided insights into the evolutionary history of  
620 ciliary signaling proteins and identified previously unknown cilia proteins. Similar to the  
621 analysis brought to bear on cilia here, we propose that proteomic profiling of other organelles,  
622 such as mitochondria or lysosomes, from multiple, diverse organisms will help to define their  
623 evolutionary trajectories and elucidate their core components.

624

## 625 **METHODS**

### 626 **Animal husbandry and embryo culture**

#### 627 Sea urchins

628         Adult *S. purpuratus* were obtained from UC Davis Bodega Marine Laboratory (Bodega  
629 Bay, CA) or Kerckhoff Marine Laboratory (Corona Del Mar, CA) and housed in tanks  
630 containing artificial seawater (Instant Ocean, Blacksburg, VA) at 12-15°C. Gametes were  
631 collected by bathing the gonads with 0.5M KCl to stimulate release of eggs and sperm. Eggs  
632 were washed 3 times with natural seawater and approximately 2,000,000 eggs were fertilized  
633 with a drop of sperm in 500ml of natural seawater. The embryos were cultured at approximately  
634 14°C with constant, gentle stirring.

#### 635 Sea anemones

636 *N. vectensis* were maintained in 33% artificial seawater and spawning was induced as  
637 described (Fritzenwanker and Technau, 2002). Embryos were cultured at 21°C in 33% artificial  
638 seawater.

#### 639 Choanoflagellates

640 An environmental isolate of *S. rosetta* (ATCC50818) that had been treated with  
641 antibiotics to reduce bacterial diversity and subsequently supplemented with *Algoriphagus*  
642 *machipongonensis* to induce colonies (Fairclough et al., 2010) was cultured in cereal grass  
643 infused artificial seawater (Tropic Marine, Montague, MA) diluted to 10% in artificial seawater  
644 (King et al., 2009) at approximately 22°C.

#### 645 Zebrafish

646 *Danio rerio* of the *Ekkwill* strain were reared at 28°C and embryos were obtained from  
647 natural matings. Embryos were cultured at 28°C for 4-6 hours post fertilization and then  
648 maintained at approximately 22°C.

#### 649 Xenopus laevis

650 *X. laevis* husbandry and experiments were performed using standard conditions and  
651 following animal ethics guidelines of the University of Texas at Austin, protocol number AUP-  
652 2015-00160.

#### 653 Nematostella vectensis

654 Animals were maintained in 1/3 filtered seawater and induced to spawn as described  
655 (Fritzenwanker and Technau, 2002). Egg packages were fertilized and embryos were raised at  
656 21°C.

657

#### 658 **Cilia isolation**

##### 659 Sea urchins

660 Gastrula stage *S. purpuratus* embryos were concentrated by centrifugation at 170-200 g  
661 for 4-10 minutes at 4°C and washed 3-4 times with artificial seawater. To amputate cilia,  
662 embryos were gently resuspended in a high salt solution (artificial seawater + 0.5M NaCl)  
663 approximately 10 times the volume of the embryo pellet. The samples were immediately spun at  
664 400 g for 5 minutes at 4°C to pellet deciliated embryos. The supernatant was transferred to a

665 fresh tube and spun a second time to pellet any remaining embryos. The supernatant containing  
666 cilia was then spun at 10,000 g for 20 minutes at 4°C and the resulting cilia pellet was collected  
667 for subsequent analysis. Cilia samples for mass spectrometry were resuspended in 0.1%  
668 *RapiGest* SF Surfactant (Waters, Milford, MA).

669 To separate the axonemes from the membrane plus matrix fraction, pelleted cilia were  
670 resuspended in extraction buffer (1% Nonidet NP-40, 30mM Hepes, pH7.4, 5mM MgSO<sub>4</sub>,  
671 0.5mM EDTA, 25mM KCl, 1mM DTT) and centrifuged at 30,000 g for 20 minutes at 4°C. The  
672 supernatant (membrane plus matrix fraction) was separated from the pellet (axonemes) and the  
673 pellet was resuspended in SDS extraction buffer (0.5% SDS, 50mM NaCl, 50mM Tris, pH 7.4).  
674 Both samples were precipitated in methanol:chloroform (4:1) and resuspended in 0.1% *RapiGest*  
675 SF Surfactant for mass spectrometry.

#### 676 *Sea anemones*

677 *N. vectensis* planula larva (day 3 of development) were washed twice with 33% artificial  
678 seawater containing 20mM DTT and then transferred to high salt solution (artificial seawater,  
679 0.5M NaCl, 100mM DTT, Complete Mini protease inhibitor without EDTA (Roche)) and  
680 incubated with gentle agitation at 4°C for 5 minutes. The embryos were removed by  
681 centrifugation at 400 g for 2 minutes at 4°C. The supernatant containing cilia was transferred to  
682 LoBind microcentrifuge tubes (Eppendorf, Hamburg, Germany) and centrifuged at 10,000 g for  
683 10 minutes at 4°C to pellet cilia. The pellet was gently resuspended and diluted to 600µl with  
684 33% artificial seawater containing 100mM DTT. The cilia sample was overlain onto a sucrose  
685 step gradient from 80-30% sucrose (sucrose solution contained 50mM Tris, pH8.0, 10mM DTT),  
686 step size 10%, 1ml per step. The sample was spun at 100,000 g in a swinging bucket rotor for 3  
687 hours at 4°C and fractions were collected from the bottom of the tube by puncturing with a 30  
688 gauge needle and allowing the sample to flow by gravity. A portion of each fraction was  
689 analyzed by immunoblot to determine which fractions contained high levels of TUB<sup>ac</sup> and low  
690 levels of Actin (Figure 1C, e.g. fractions 6 and 7). To concentrate the samples and remove the  
691 sucrose, the protein was precipitated using 16% trichloroacetic acid (TCA) and washed 2 times  
692 with acetone, then resuspended in *RapiGest* SF Surfactant for mass spectrometry.

#### 693 *Choanoflagellates*

694 Before flagellar amputation, 8L of *S. rosetta* culture were harvested at peak density by  
695 centrifugation at 4,000 g for 15 minutes at 4°C to pellet colonies. Colonies were concentrated

696 into approximately 250ml and passed through a 40  $\mu$ m filter to remove clumps of bacteria. *S.*  
697 *rosetta* were then centrifuged at 2,000 g for 15 minutes at 4°C. The pellet was resuspended in  
698 20ml of artificial seawater (Tropic Marin). The sample was split in half and overlain onto 2ml of  
699 Percoll solution (8% Percoll - GE Healthcare, 0.5M sorbitol, 50mM Tris, pH8.0, 15mM MgCl<sub>2</sub>,  
700 1% artificial seawater) and spun at 1,000 g for 10 minutes at room temperature. The supernatant  
701 containing bacteria was removed and the pellet of *S. rosetta* colonies was gently resuspended in  
702 50ml of artificial seawater. The culture was incubated for 20 hours to allow the *S. rosetta* to eat  
703 the residual bacteria.

704 To amputate flagella, *S. rosetta* colonies were concentrated by centrifugation at 2,000 g  
705 for 15 minutes and resuspended in 10 ml of HMSA (10mM Hepes, pH7.4, 5mM MgSO<sub>4</sub>, 10%  
706 sucrose, 5% artificial seawater). The colonies were transferred to a 10cm dish and 700 $\mu$ M  
707 dibucaine was added. The dish was agitated gently for 5 minutes and deflagellation was visually  
708 followed using a stereomicroscope. Additional dibucaine was added as needed until the majority  
709 of flagella were amputated. Immediately after flagellar amputation, 5ml of 10mM Hepes, pH7.4,  
710 5mM MgSO<sub>4</sub>, 1mM EGTA was added to the sample.

711 To separate the flagella from the cell bodies, the sample was split in half and purified  
712 over Percoll as described above. The top, clear layer containing the flagella was collected and the  
713 pellet and bottom 2 ml containing most of the cells were discarded. The flagellar fraction was  
714 spun at 16,000 g for 20 minutes at 4°C to pellet the flagella. To further purify the sample, the  
715 flagellar pellet was gently resuspended in ~800 $\mu$ l of artificial seawater and overlain onto a  
716 sucrose step gradient. The sucrose was dissolved in 10mM Hepes, pH7.4, 5mM MgSO<sub>4</sub>, 5%  
717 artificial seawater and a step gradient from 40-80% sucrose was prepared using 10% steps, 1ml  
718 of each step. The sample was spun at 100,000 g for 3 hours at 4°C. To collect fractions, a hole  
719 was punctured in the bottom of the tube using a 25 gauge needle and fractions between 100 and  
720 700 $\mu$ l were captured.

721 A small portion of each fraction was analyzed by immunoblot to determine which  
722 fractions contained high levels of TUB<sup>ac</sup> and low levels of Actin (Figure 1G, Fractions 4 and 5).  
723 Samples from 2 experiments were pooled for mass spectrometry. Fraction 1 and 10 were also  
724 analyzed by mass spectrometry to use for comparison (see below). The samples were TCA  
725 precipitated, washed and resuspended for mass spectrometry as described above.

726

727 **Mass spectrometry and protein identification**

728 Purified cilia or flagella were lysed in a buffer containing 8M urea, 150mM NaCl, and  
729 protease inhibitors (Complete, EDTA-free tablet, Roche) and digested with Trypsin (Ramage et  
730 al., 2015). For samples that were fractionated, the digested peptides (100µg) were fractionated  
731 using hydrophilic interaction chromatography (HILIC). The samples were injected onto a  
732 TSKgel amide-80 column (Tosoh Biosciences, 2.0 mm x 15 cm packed with 5 µm particles)  
733 equilibrated with 10% HILIC buffer A (2% acetonitrile [ACN], 0.1% trifluoroacetic acid [TFA])  
734 and 90% HILIC buffer B (98% ACN, 0.1% TFA) using an AKTA P10 purifier system. The  
735 samples were then separated using a one-hour gradient from 90% HILIC buffer B to 55% HILIC  
736 buffer B at a flow rate of 0.3 ml/min. Fractions were collected every 1.5 min and combined into  
737 12 fractions based on the 280 nm absorbance chromatogram. Fractions were evaporated to  
738 dryness and reconstituted in 20 µl of 0.1% formic acid for mass spectrometry analysis.

739 All samples were analyzed on an Orbitrap Elite mass spectrometry system equipped with  
740 an Easy-nLC 1000 HPLC and autosampler. HILIC fractionated samples were injected onto a pre-  
741 column (2 cm x 100 µm I.D. packed with 5 µm C18 particles) in 100% buffer A (0.1% formic  
742 acid in water) and separated on an analytical column (10 cm x 75 µm I.D. packed with 1.9 µm  
743 C18 particles) with a 60 minute reverse phase gradient from 5% to 30% buffer B (0.1% formic  
744 acid in 100% ACN) at a flow rate of 400 nl/min. The mass spectrometer continuously collected  
745 spectra in a data-dependent manner, acquiring a full scan in the Orbitrap (at 120,000 resolution  
746 with an automatic gain control target of 1,000,000 and a maximum injection time of 100 ms),  
747 followed by collision-induced dissociation spectra for the 20 most abundant ions in the ion trap  
748 (with an automatic gain control target of 10,000, a maximum injection time of 10 ms, a  
749 normalized collision energy of 35.0, activation Q of 0.250, isolation width of 2.0 m/z, and an  
750 activation time of 10.0). Singly and unassigned charge states were rejected for data-dependent  
751 selection. Dynamic exclusion was enabled to data-dependent selection of ions with a repeat  
752 count of 1, a repeat duration of 20.0 s, an exclusion duration of 20.0 s, an exclusion list size of  
753 500, and exclusion mass width of +/- 10.00 parts per million (ppm).

754 Samples that were not HILIC fractionated were injected onto a high resolution C18  
755 column (25 cm x 75 µm I.D. packed with ReproSil Pur C18 AQ 1.9 µm particles) in 0.1% formic  
756 acid and then separated with a two-hour gradient from 5% to 30% ACN in 0.1% formic acid at a  
757 flow rate of 300 nl/min. The mass spectrometer collected data in a data-dependent fashion,

758 collecting one full scan in the Orbitrap at 120,000 resolution with an AGC target of 1,000,000  
759 followed by 20 collision-induced dissociation MS/MS scans in the dual linear ion trap with an  
760 AGC target of 30,000 for the 20 most intense peaks from the full scan. Dynamic exclusion was  
761 enabled to exclude masses within +/- 10 ppm for 30 s a repeat count of 1. Charge state screening  
762 was employed to reject analysis of singly charged species or species for which a charge could not  
763 be assigned.

764 Raw mass spectrometry data were analyzed by the Protein Prospector suite (Clauser et al.,  
765 1999). Data were matched to *S. purpuratus*, *N. vectensis* and *S. rosetta* protein sequences  
766 downloaded from UniProt containing 28,593, 24,435, and 11,698 protein sequences,  
767 respectively, concatenated to a decoy database where each sequence was randomized in order to  
768 estimate the false positive rate. The searches considered a precursor mass tolerance of +/- 20  
769 ppm and fragment ion tolerances of 0.8 da, and considered variable modifications for protein N-  
770 terminal acetylation, protein N-terminal acetylation and oxidation, glutamine to pyroglutamate  
771 conversion for peptide N-terminal glutamine residues, protein N-terminal methionine loss,  
772 protein N-terminal acetylation and methionine loss, and methionine oxidation, and constant  
773 modifications for carbamidomethyl cysteine. Prospector data was filtered using a maximum  
774 protein expectation value of 0.01 and a maximum peptide expectation value of 0.05.

775

#### 776 **Membrane plus matrix enrichment analysis**

777 To identify proteins that were enriched in the membrane + matrix fraction of sea urchin  
778 cilia, the unique peptide count (the number of distinct peptide sequences identified for each  
779 protein) was used as a proxy for protein abundance.  $[M/M+1/total+1]-[Ax+1/total+1] =$   
780 enrichment score. The membrane plus matrix enrichment score for cilia from early gastrula  
781 embryos and late gastrula embryos was summed to determine the final enrichment score.

782

#### 783 **Choanoflagellate ciliome subtractive analysis**

784 To identify proteins that were enriched in the cilia of *S. rosetta*, we compared the unique  
785 peptide count of two cilia samples (Figure 1G, fractions 4 and 5) to the cell body sample  
786 (fraction 1) and the microvilli sample (fraction 10) and discounted proteins that did not have a  
787 unique peptide count in either fraction 4 or 5 that was greater than fraction 1 and 10.

788

789 **Identification of the conserved ciliome**

790 To identify ciliome proteins with a homolog in *M. musculus*, we used the BLAST+ suite  
791 of executables (Camacho et al., 2009). For each organism analyzed by mass spectrometry, full  
792 predicted protein sequences of proteins associated with 2 or more unique peptide hits were used  
793 to query the *M. musculus* proteome (ensembl.org) using blastp (Expected value cutoff  $1e^{-5}$ ). The  
794 top hit was classified as the mouse homolog. If reciprocal blast of the mouse protein homolog to  
795 the source organism's proteome (downloaded from unprot.org) retrieved the original query  
796 protein (best reciprocal BLAST method), we considered the two proteins to be orthologs.

797

798 **CRAPome analysis**

799 To remove common protein contaminants from the conserved ciliome, we used the  
800 CRAPome database (crapome.org) (Mellacheruvu et al., 2013) to determine the number of times  
801 each protein was identified in another control proteomics experiment. We removed proteins from  
802 the conserved ciliome that were identified in over 70 control experiments (Table S1).

803

804 **SYSCILIA gold standard analysis**

805 To determine the proportion of ciliary SYSCILIA gold standard proteins (SCGSv1) (van  
806 Dam et al., 2013), with localization distal to the transition zone, that was present in the ciliome  
807 of each organisms, we determined the number of human ciliary SCGSv1 proteins had an  
808 ortholog in the proteome of *S. purpuratus*, *N. vectensis* and *S. rosetta* using InParanoid8  
809 (<http://inparanoid.sbc.su.se/cgi-bin/index.cgi>) (Sonnhammer and Östlund, 2015). We then  
810 counted the number of proteins in the ciliome of each organism with an ortholog to a human  
811 ciliary SCGSv1 protein. To calculate the percentage of ciliary SCGSv1 proteins in previously  
812 published ciliomes, we downloaded data sets from Cildb V2.0 using the low stringency threshold  
813 (Avidor-Reiss et al., 2004; Ishikawa et al., 2012; Li et al., 2004, Mick et al., 2015; Ostrowski et  
814 al., 2002; Pazour et al., 2005).

815

816 **Choanoflagellate-*Chlamydomonas* ciliome comparison**

817 We used blastp (Expected value cutoff  $1e^{-5}$ ) to determine which protein homologs in the  
818 *S. rosetta* ciliome were present in the *Chlamydomonas reinhardtii* ciliary proteome (Pazour et



819 al., 2005). Proteins with 2 or more peptides in the *C. reinhardtii* ciliary data set were included in  
820 the analysis.

821

## 822 **Identification of known ciliary proteins and disease classification**

823 To identify the ciliome proteins previously implicated to be involved in ciliary biology,  
824 the Biomart tool in Cildb V2.0 ([cildb.cgm.cnrs-gif.fr](http://cildb.cgm.cnrs-gif.fr)) was used to obtain the mouse ortholog of  
825 all cilia in 15 studies using the medium threshold (Avidor-Reiss et al., 2004; Blacque et al.,  
826 2005; Boesger et al., 2009; Broadhead et al., 2006; Cao et al., 2006; Chen et al., 2006; Efimenko  
827 et al., 2005; Laurençon et al., 2007; Li et al., 2004; Liu et al., 2007; Mayer et al., 2008; Merchant  
828 et al., 2007; Ostrowski et al., 2002; Pazour et al., 2005; Smith et al., 2005). For 4 studies that  
829 were not included in Cildb but used in our comparison, we obtained protein identifiers directly  
830 (Choksi et al., 2014; Ishikawa et al., 2012; Mick et al., 2015; Narita et al., 2010). See Table S4  
831 for details on each study.

832 Online Mendelian Inheritance in Man (OMIM; [omim.org](http://omim.org)), Orphanet ([orpha.net](http://orpha.net)) and  
833 Developmental Disorders Genotype-to-Phenotype database (DDG2P) (Wright et al., 2015)  
834 databases were used to identify genes associated with human disease.

835

## 836 **CLIME analysis**

837 The phylogenetic distributions of ciliome members with mouse homologs was assessed  
838 by a computational algorithm, CLustering by Inferred Models of Evolution (CLIME) (Li et al.,  
839 2014). We evaluated how closely the ciliome member matched the phylogenetic distribution of  
840 cilia by assigning it a positive point for every ciliated organism in which it has a detected  
841 homolog (listed in Figure S2 legend), and a negative point for every unciliated organism in  
842 which it has a detected homolog, with a prokaryote homolog being weighted tenfold more.  
843 Genes that scored greater than 29 in this metric were considered to be co-evolved with cilia.  
844 Genes that scored less than 1 were considered to be not co-evolved with cilia. Genes with  
845 intermediate scores were considered to be neither.

846

## 847 **Protein sequences alignments**

848 Alignments were built using MUSCLE and displayed using Jalview. The ClustalX color  
849 scheme was used to indicate residues with similar chemical properties.



850

### 851 **Random selection of proteins for ciliary localization screen**

852 To select proteins for subcellular localization studies, 49 proteins from the high-  
853 confidence ciliome (Table S1) and 30 human genes not present in the ciliomes were selected by  
854 the RANDBTWN function of Excel (Microsoft) from the ENSEMBL list of human protein  
855 coding genes. Of these genes, 40 were represented by Gateway-compatible clones of the human  
856 ortholog present in the hORFeome v8.1 (Yang et al., 2011). We used Gateway-mediated  
857 subcloning to insert the open reading frame of the remaining genes in frame with the EGFP open  
858 reading frame of pCS-EGFP-DEST (Villefranc et al., 2007), as described below in Expression  
859 constructs and *in situ* probe plasmid generation. The list of the genes cloned is included in Table  
860 S5.

861

### 862 **Mammalian cell line culture and transfection**

863 RPE-1 cells (ATCC CRL-4000) were cultured in Dulbecco's modified Eagle's medium  
864 (DMEM) High Glucose/F-12 50:50 (Cell Culture Facility (CCF)), University of California, San  
865 Francisco, CA) supplemented with 10% fetal bovine serum (FBS) (Gibco) and Glutamax  
866 (Gibco). IMCD3 cells (ATCC CRL-2123) were cultured in DMEM:F12 (Gibco) supplemented  
867 with 10% FBS and Glutamax. All cell lines were transfected using jetPRIME (Polyplus-  
868 transfection, New York, NY).

869

### 870 **Mouse tracheal epithelial cell culture and infection**

871 Mouse tracheal epithelial cell (mTECs) were isolated from C57BL/6J mice and cultured  
872 as described previously (You and Brody, 2012). Proliferating mTECs were infected with  
873 lentivirus carrying shRNAs (produced by UCSF Viracore, San Francisco, CA) as described  
874 previously (Vladar and Brody, 2013). To select for infected cells, mTECs were cultured with 2-  
875 4mg/ml Puromycin for 10 days before initiating differentiation by culturing cells at the air-liquid  
876 interface. See Table S9 for shRNA sequences.

877

### 878 **Immunofluorescent staining and imaging**

879 *Sea urchin embryos*

880 *S. purpuratus* embryos were fixed in 2% paraformaldehyde (PFA) in PEM (20mM  
881 PIPES, 0.5mM EGTA, 20mM MgCl<sub>2</sub>) + 0.1% Triton X-100 for 3 days, blocked in PBST (PBS +  
882 0.1% Triton X-100) containing 10% donkey serum for 1 hour, and incubated with primary  
883 antibodies overnight at 4°C. Embryos were incubated with secondary antibodies and Hoechst  
884 33342 (1µg/ml) for 1 hour, then incubated for 10 minutes with increasing concentrations of  
885 glycerol (10%, 25%, 50% in PBS; 10 minutes for each glycerol solution). Embryos were  
886 mounted in 50% glycerol in PBS for imaging.

#### 887 Sea anemone embryos

888 To visualize Actin and TUB<sup>ac</sup>, *N. vectensis* embryos were fixed for 1.5 minutes in 3.7%  
889 Formaldehyde, 0.25% Gluteraldehyde in 33% artificial seawater and then in 3.7%  
890 Formaldehyde, 0.1% Tween-20 for 1 hour at 4°C. Embryos were blocked in PBST containing  
891 10% donkey serum for 1 hour and subsequently incubated with primary antibodies and Alexa  
892 Fluor 555 Phalloidin (Invitrogen) overnight at 4°C. After washing with PBST, the embryos were  
893 incubated with secondary antibodies and DAPI (1µg/ml) for 1 hour. Primary and secondary  
894 antibodies were diluted in PBST + 2% BSA. Embryos were mounted in ProLong Gold Antifade  
895 Mounant (Invitrogen).

#### 896 Choanoflagellate colonies

897 *S. rosetta* colonies were Percoll purified as described above to remove bacteria, placed on  
898 poly-L-lysine coated coverslips and incubated for 15 minutes to allow cells to attach. 6% acetone  
899 diluted in PEM was applied to the cells for 5 minutes, removed and the cells were subsequently  
900 fixed in 4% PFA in PEM for 10 minutes. Cells were blocked with 2% BSA in PEM + 0.1%  
901 Triton X-100. To stain for Actin and β-tubulin, embryos were incubated with primary antibodies  
902 overnight and secondary antibodies, Alexa Fluor 568 Phalloidin (Invitrogen) and DAPI (1µg/ml)  
903 for 1 hour. Coverslips were mounted in ProLong Gold Antifade Mounant (Invitrogen).

#### 904 Mammalian cells

905 Cells were cultured on coverslips, fixed for 8-10 minutes with 4% PFA in PBS, and  
906 blocked with 5% Donkey Serum in PBST for 30 minutes. Cells were incubated with primary  
907 antibodies overnight at 4°C and secondary antibodies and Hoechst 33342 for 1 hour. All  
908 antibodies were diluted in 2% BSA, 1% donkey serum in PBST. Coverslips were mounted in  
909 ProLong Gold or Diamond Antifade mountant (Invitrogen).

#### 910 Isolated cilia

911 Isolated cilia were applied to poly-L-lysine coated coverslips and incubated for 15  
912 minutes to allow cilia to attach to the surface of the coverslip, then fixed with 4% PFA in PBS  
913 for 10 minutes and immunostained as described for mammalian cells.

#### 914 Mouse embryos

915 Pregnant female mice were sacrificed, embryos isolated in PBS and fixed in 4% PFA in  
916 PBS for 30 minutes. The embryos were washed with PBST three times, 5 minutes each. After  
917 blocking in 1% BSA and PBST for two hours, the embryos were incubated in primary antibodies  
918 overnight in blocking solution at 4°C. Following washes with PBST, the samples were incubated  
919 with secondary antibodies and Hoechst 33342 in blocking solution for 1 hour. The embryos  
920 washed with PBST and mounted in ProLong Diamond Antifade mountant (Invitrogen).

#### 921 mTECs

922 mTEC cells were fixed on culture membranes in 4% PFA in PBS for 10 minutes. The  
923 cells were incubated in 1% SDS, PBST for 5 minutes, washed with PBST and then stained as  
924 described above for mammalian cells. Structured illumination microscopy (SIM) data for mTECs  
925 (Figure 5H) were collected on a Nikon N-SIM microscope in 3D-SIM mode using an Apo TIRF  
926 100x/1.49 Oil objective.

#### 927 Zebrafish

928 *D. rerio* embryos were fixed in 4% PFA in PBS for 2 hours, washed 3 times in PBS,  
929 blocked in PBDT (PBS + 1% BSA, 1% DMSO, 0.5% Triton X-100) containing 10% donkey for  
930 1 hour serum and stained with primary antibody diluted in PBDT overnight at 4°C. Embryos  
931 were incubated with secondary antibodies and Hoechst 33342 (1µg/ml) for 1 hour and mounted  
932 in 50% glycerol for imaging.

#### 933 Human nasal brush biopsies

934 Nasal brush biopsies were obtained from the middle turbinate with a cytology brush and  
935 suspended in RPMI cell culture medium (GIBCO), as previously described (Wallmeier et al.,  
936 2014). Cells were spread on glass slides, air dried and stored at -80°C until use. Defrosted  
937 samples were fixed in 4% PFA in PBS for 15 minutes. After washing with PBS, the cells were  
938 permeabilized with 0.2% Triton-X 100 in PBS for 15 minutes. Following washes with PBS,  
939 samples were blocked in blocking solution (1-5% skim milk in PBS) at 4°C overnight. Samples  
940 were incubated for at least 3 hours with primary antibodies diluted in blocking solution. Slides  
941 were rinsed with PBST, washed with blocking solution and incubated with secondary antibodies

942 in blocking solution for 30 minutes. After washes with PBS, the nuclei were stained with  
943 Hoechst 33342 for 10 minutes. High-resolution fluorescence images were acquired either with a  
944 Zeiss LSM880 using ZEN2 software or with a Zeiss AxioObserver Z1 Apotome with  
945 AxioVision 4.8 software (Carl Zeiss, Jena, Germany) and processed with ZEN2 Software and  
946 Adobe Creative Suite 4 (Adobe Systems Incorporated, San Jose, CA).

947

948 All other images were acquired on the Leica TCS SPE laser scanning confocal  
949 microscope and processed using FIJI and Adobe Photoshop CS5.1 unless otherwise specified.

950

### 951 **Expression of GFP-tagged proteins in Zebrafish embryos**

952 Capped mRNAs were synthesized using mMESSAGING mMACHINE SP6 transcription kit  
953 (Invitrogen Ambion). Embryos were injected at the 1-2 cell stage with 125-250pg of RNA.

954

### 955 ***Xenopus* ENKUR-GFP expression, morpholino knockdown and imaging**

956 *X. laevis* embryo manipulations and injections were carried out using standard protocols.

957 For ENKUR-GFP, capped mRNA was synthesized using mMESSAGING mMACHINE SP6  
958 transcription kit (Invitrogen Ambion). A morpholino antisense oligonucleotide (MO) against

959 *Enkurin* was designed to block splicing (Gene Tools). Its sequence was 5'-

960 AATGACTATCCACTTACTTTCAGCC - 3'. mRNA and MOs were injected into two ventral

961 blastomeres or two dorsal blastomeres at the 4-cell stage to target the epidermis or the gastrocoel

962 roof plate (GRP), respectively. Each mRNA or MO was used at the following dosages: GFP-

963 Enkurin (60 pg), centrin4-BFP (40 pg), memRFP (50 pg) and Enkurin MO (20 ng). To verify the

964 efficiency of *Enkurin* MO, MO was injected into the all cells at 4-cell stage and then RT-PCR

965 was performed as described (Toriyama et al., 2016) (see table S9 for primers).

966 Confocal images were captured with LSM700 inverted confocal microscope (Carl Zeiss)

967 with a Plan-APOCHROMAT 63×/1.4 oil immersion objective. Bright field images were

968 captured on a Zeiss Axio Zoom. V16 stereo microscope with Carl Zeiss AxioCam HRc color

969 microscope camera.

970

### 971 **Immunoblotting**

972 Tissue was lysed using RIPA buffer (50mM Tris, pH 7.4, 150mM NaCl, 1% NP-40,  
973 0.5% sodium deoxycholate) supplemented with protease inhibitors (Calbiochem, Billerica, MA).  
974 Protein samples were separated on 4–15% gradient TGX precast gels (Bio-Rad, Hercules, CA),  
975 transferred to nitrocellulose membrane (Whatman, Pittsburgh, PA). Membranes were blocked  
976 and antibodies were diluted in 5% milk in TBST (50mM Tris, pH 7.6, 150mM NaCl, 0.1%  
977 Tween 20) and analyzed using ECL Lightening Plus (Perkin–Elmer, Waltham, MA).

978

### 979 **Antibodies**

980 Primary antibodies used were anti- $\beta$ -actin (60008-I-Ig, ProteinTech, Rosemont, IL and  
981 ab8227, Abcam, Cambridge, MA), anti-TUB<sup>ac</sup> (clone 6-11B-1, Sigma-Aldrich, St. Louis, IL),  
982 anti- $\beta$ -tubulin (E7, Developmental Studies Hybridoma Bank, Iowa City, Iowa), anti-GFP (ab290,  
983 Abcam and sc-9996, Santa Cruz Biotechnology, Inc., Dallas, Texas), anti-ARL13B (clone  
984 N295B/66, Neuromab, Davis, CA and 17711-1-AP, ProteinTech), anti-ENKUR (HPA037593,  
985 Atlas Antibodies, Stockholm, Sweden), anti-ENKUR for SIM imaging (gift from H. Floreman,  
986 unpublished), anti-CCDC39 (HPA035364, Sigma), anti-CCDC151 (HPA044184, Atlas  
987 Antibodies), anti-DNAH5 (previously reported (Omran et al., 2008a)), anti-GAS8 (HPA041311,  
988 Atlas Antibodies), anti-DNAH11 (previously described (Dougherty et al., 2016)), anti-RSPH9  
989 (HPA031703, Sigma), anti-DNALI1 (HPA028305, Atlas Antibodies), anti-CCDC11  
990 (HPA041069, Atlas Antibodies).

991 All secondary antibodies for immunofluorescent staining were Alexa-conjugated  
992 (Invitrogen). Hoechst 33342 was obtained from Invitrogen or Sigma-Aldrich. DAPI was  
993 obtained from Sigma-Aldrich. All horseradish peroxidase secondary antibodies for  
994 immunoblotting were obtained from Jackson ImmunoResearch Laboratories, Inc. (West Grove,  
995 PA).

996

### 997 **Quantitative RT-PCR**

998 RNA was extract from cells using the RNeasy Mini or Micro Kit (Qiagen, Hilden,  
999 Germany) and cDNA was synthesized using iScript cDNA Synthesis Kit (BioRad). Quantitative  
1000 PCR was performed using EXPRESS SYBR GreenER with Premixed ROX (Invitrogen) and the  
1001 7900HT Fast Real-Time PCR System (ThermoFisher Scientific). Relative expression was  
1002 calculated using the delta-delta CT method (Livak and Schmittgen, 2001). For measuring

1003 expression of *Enkur*, the geometric mean of *Ubiquitin C (Ubc)* and *Hydroxymethylbilane*  
1004 *synthase (Hmbs)* expression was used as the endogenous control for normalization. See Table S9  
1005 for primer sequences. The data were analyzed using Microsoft Excel and plotted using Prism7.  
1006

### 1007 **Expression constructs and *in situ* probe plasmid generation**

1008 To construct the GFP-tagged expression plasmids for *S. purpuratus* ENKUR, ARRB1  
1009 and OPRM1L, gene specific cDNA was made from RNA of gastrula stage embryos using  
1010 AccuScript (Agilent) or SuperScriptIII (Thermo Fisher Scientific), PCR amplified using primers  
1011 containing the cutsites indicated below and TOPO-TA cloned into PCR2.1 (Invitrogen). The  
1012 following restriction enzymes were used to insert cloned cDNA in the pCS2+8CeGFP  
1013 (Gökirmak et al., 2012): for ENKUR - AscI and ClaI, for ARRB1 - AscI and PacI, OPRM1L -  
1014 BamHI and ClaI. Unless otherwise indicated, the reverse primer for each gene was used to make  
1015 gene specific cDNA. To construct the *L. variegatus* *in situ* probe, 480bp fragment of *L.*  
1016 *variegatus Enkurin* synthesized using gBlocks Gene Fragments (IDT, San Diego, CA).

1017 To generate the *X. laevis* ENKUR-GFP expression construct, full length of *Enkurin*  
1018 cDNA was amplified from *X. laevis* RNA and cloned into pCS10R vector fused with N-terminal  
1019 GFP using Sall and NotI. To generate the *X. laevis* *in situ* probe, the above plasmid was cut with  
1020 Sall and synthesized using the T7 promoter. *Pitx2c* *in situ* probe, membrane-RFP (CAAX motif  
1021 fused to RFP) and Centrin 4-BFP plasmids described in (Toriyama et al., 2016).

1022 To create GFP fusions of human proteins to screen for ciliary localization in IMCD3s and  
1023 *D. rerio* embryos human cDNA was cloned into pCS-eGFP-DEST using the Gateway system.

1024 To construct the *S. rosetta* ENKUR-GFP expression plasmid, full-length cDNA (gift  
1025 from Nicole King) was amplified, subcloned into pDONR221 and then cloned into pCS-eGFP-  
1026 DES using the Gateway system.

1027 To generate the mouse *Enkur* *in situ* probe, cDNA from *M. musculus* testis served as  
1028 template for PCR for cloning a 598 bp fragment of *Enkur*. Via TOPO cloning, the fragment was  
1029 ligated into the pCRII-TOPO vector (K4610, ThermoFisher Scientific,). The plasmid for the  
1030 *Lefty2* *in situ* probe was a gift from R. Harland (Meno et al., 1997). The IMAGE clone ID  
1031 790229

1032 The mouse *Enkur* shRNAs were expressed in pLKO.1 and were purchased from Sigma-  
1033 Aldrich, MISSION shRNA collection (see Table S9 for clone numbers).



1034 All primer and shRNA sequences are listed in Table S9.

1035

1036 **In situ hybridization**

1037 *Mus musculus*

1038 For the mouse *Enkur* in situ probe, plasmid was digested with NotI for antisense probes  
1039 and BamHI for sense control probes and purified using phenol and chloroform (see Table S9 for  
1040 primers). Digested plasmid DNA served as template for *in vitro* transcription with Sp6  
1041 (antisense) or T7 (sense) RNA polymerases to generate digoxigenin (DIG) labeled RNA probes  
1042 (Roche). For the *Lefty2* probe, plasmid was digested with EcoRI and *in vitro* transcribed using  
1043 T7 RNA polymerase. For the *Cerl2* probe (IMAGE clone ID 790229), plasmid was digested with  
1044 NotI and *in vitro* transcribed using T7 RNA polymerase.

1045 Embryos were fixed in 4% PFA in PBS for at least 24 hours, transferred to methanol and  
1046 stored at -80°C until use or, if in situ was performed within 2 weeks of dissection, embryos were  
1047 stored in fixative at 4°C. If in methanol (Fig S5 only), embryos were rehydrated to PBST,  
1048 bleached with 6% H<sub>2</sub>O<sub>2</sub> for 1 hour, digested with 10µg/ml proteinase K (Roche) for 8 minutes  
1049 and fixed with 4% PFA and 0.2% glutaraldehyde. The embryos were incubated in hybridization  
1050 solution (50% formamide, 0.5% CHAPS, 0.2% Tween, 1.3x SSC, 5mM EDTA, 50µg/ml yeast t-  
1051 RNA; 700U/ml Heparin) at 65°C for several hours. Hybridization with the DIG-labeled RNA  
1052 probes was performed overnight at 65°C in hybridization solution. The following day, embryos  
1053 were washed two times with fresh hybridization solution for 1hr each, transferred to MABT  
1054 (100mM Maleic acid, pH7.5, 150 mM NaCl, 0.5%Tween) and washed 3 times with MABT for  
1055 15 minutes each. After incubating with blocking solution (2% Boehringer Blocking Reagent  
1056 (Roche), 20% heat-treated sheep serum in MABT) for 1 hour the embryos were incubated  
1057 overnight at 4°C with AP-anti-DIG antibody diluted in blocking solution. Following 4 washing  
1058 steps in MABT for 1 hour each, and 1 wash overnight at 4°C the embryos were transferred to  
1059 NTMT (100mM NaCl, 100 Tris, pH9.5, 50mM MgCl<sub>2</sub>, 0.1% Tween). Color was developed  
1060 using NBT/BCIP or MB Purple Substrate (Roche). Embryos were imaged using a Zeiss  
1061 Discovery.V12 stereomicroscope and AxioCam MRc camera or a Nikon Digital Sight DS-L3  
1062 camera mounted on a Nikon SMZ1000 stereomicroscope. Images were processed using creative  
1063 suite (Adobe).

1064 *Xenopus*

1065 Whole mount in situ hybridization of *X. laevis* embryos was performed as described previously  
1066 (Sive et al., 2000) using DIG-labeled single-stranded RNA probes against *Enkurin* and *Pitx2c*  
1067 (see Table S9 for primers).

#### 1068 *Sea urchin*

1069 Whole mount in situ hybridization of *Lytechinus variegatus* embryos was performed as  
1070 described previously (Warner et al., 2016) using DIG-labeled single-stranded RNA probes  
1071 against a *Enkur* (see Table S9 for primers).

#### 1072 *Sea anemone*

1073 Whole mount in situ hybridization of *N. vectensis* embryos was performed as described  
1074 previously (Bause et al., 2016) using DIG-labeled single-stranded RNA probes against *Enkurin*  
1075 (see Table S9 for primers).

1076

#### 1077 **High speed video microscopy of cilia of the mouse tracheal epithelium**

1078 Mouse trachea were dissected and imaged as described in (Francis and Lo, 2013). Video  
1079 were captured on a Nikon Ti with PFS3 inverted microscope using a Andor Zyla 5.2 camera.

1080

#### 1081 **Human subject phenotyping**

1082 We obtained signed and informed consent from patients fulfilling all PCD diagnostic  
1083 criteria as well as their family members using protocols approved by the Institutional Ethics  
1084 Review Board of the University of Muenster (Germany). PCD phenotype was characterized by  
1085 standard clinical diagnostic criteria and documentation of typical symptoms such as neonatal  
1086 respiratory distress and signs of chronic oto-sinu-pulmonary infections with development of  
1087 bronchiectasis. Clinical diagnosis included nasal nitric oxide (NO) measurement, medical  
1088 imaging (X-Ray), high speed video microscopy (HVMA), transmission electron microscopy  
1089 (TEM) as well as immunofluorescence analysis (IF) to analyze ciliary structure and function.  
1090 The value of nasal NO was measured while performance of an exhalation-against-resistance  
1091 maneuver, as previously described (Olbrich et al., 2012). For HVMA, cells obtained by nasal  
1092 brush biopsy were spread on glass slides and immediately ciliary beating was analyzed using the  
1093 SAVA imaging analysis system (Ammons Engineering, Mt. Morris, MI). Equipment and settings  
1094 were previously described (Olbrich et al., 2015).

1095



1096 **Haplotype analysis, genome-wide SNP mapping, whole exome sequencing and Sanger**  
1097 **sequencing**

1098 Haplotype analysis and genome-wide single nucleotide polymorphism (SNP) mapping  
1099 were performed as previously described (Olbrich et al., 2012). Exome sequencing of genomic  
1100 DNA was performed at the Cologne Center for Genomics (CCG). For enrichment, the  
1101 NimbleGen SeqCap EZ Human Exome Library v2.0 was used. Enriched preparations were  
1102 sequenced with the HiSeq2000 platform (Illumina) as paired end 2x 100 bp reads. Sequencing  
1103 reads that passed quality filtering were mapped to the reference genome sequence (hg19).  
1104 Variants were analyzed using the varbank software (previously described (Olbrich et al., 2015)).  
1105 In addition to the c224-1delG mutation described above (see Results), two other SNPs were  
1106 detected in *ENKUR* that segregated with the disease phenotype (Table S7). These SNPs have  
1107 allele frequencies of 3% and 5%, indicating that they do not cause rare phenotypes like situs  
1108 inversus. PCR amplification of genomic fragments and Sanger sequencing was performed as  
1109 previously described (Tarkar et al., 2013) to analyze all *ENKUR* exons including the exon intron  
1110 boundaries (See Table S9 for primers).

1111

1112 **Mouse strains**

1113 *Enkur* mutant mice were obtained from H. Floreman and are described in (MS not  
1114 published yet). Briefly, a targeting vector was used to delete a portion of exon 2 and insert a  
1115 strong splice acceptor followed by a neomycin resistance cassette. As exons 1 and 3 are in  
1116 different reading frames, any splicing around the cassette will produce a frameshift. Mice were  
1117 maintained on a mixed C57BL/6J-129 genetic background. The Institutional Animal Care and  
1118 Use Committee at the University of California, San Francisco approved all protocols for the  
1119 *Enkur* mouse line protocols.

1120 A C57BL/6J male mouse was used for the isolation of RNA from testis for generation of  
1121 the *Enkur* in situ hybridization plasmid. CD-1 wild type embryos were used for *Enkur* in situ  
1122 hybridization (Figure S5F). All animal experiments with the CD-1 mice complied with ethical  
1123 regulations and were approved by local government authorities (Landesamt für Natur, Umwelt  
1124 und Verbraucherschutz Nordrhein-Westfalen, Germany; AZ 84-02.05.20.12.164, AZ 84-  
1125 02.05.20.12.163, AZ 84-02.05.50.15.025 and AZ 84-02.05.50.15.012).

1126

1127

1128 **Author Contributions**

1129 Conceptualization, M.A.S. and J.F.R.

1130 Methodology, M.A.S., H.O., J.J., N.K. F.R., J.B.W. and J.F.R.

1131 Investigation, M.A.S., T.M., J.J., C.L., S.P.C., G.G.<sup>3rd</sup>, H.B., G.D., P.P., C.W.

1132 Resources, H.O., N.K. F.R., J.B.W. and J.F.R.

1133 Writing – Original Draft, M.A.S. and J.F.R.

1134 Writing – Review & Editing, M.A.S., J.F.R., T.M., and F.R.

1135

1136 **Acknowledgments**

1137 We thank Fred Wilt and Christopher Killian for providing sea urchin embryos for initial  
1138 experiments and for guidance with sea urchin husbandry, Stefan Materna for sea urchin  
1139 husbandry assistance, Nicole King for providing the choanoflagellate culture line and for  
1140 experimental advice, Daniel Richter, Tera Levin and Pawel Burkhardt for counsel on  
1141 choanoflagellate culture and experiments, Hannah Elzinga for cloning a choanoflagellate gene,  
1142 Harvey Florman for sharing the *ENKUR* mutant mice, David R. McClay and Esther Miranda for  
1143 *L. variegatus* embryos and the UCSF Nikon Imaging Center for providing microscopes and  
1144 imaging assistance. We thank the PCD individuals and their families for participating in this  
1145 study and acknowledge the German patient support group “Kartagener Syndrom und Primaere  
1146 Ciliaere Dyskinesie e.V.” We thank H. Olbrich and N.T. Loges for fruitful discussions and M.  
1147 Herting, B. Lechtape, A. Robbers, D. Ernst, L. Overkamp, K. Wohlgemuth and F.J. Seesing for  
1148 excellent technical assistance, G. Nürnberg and P. Nürnberg for homozygosity mapping data,  
1149 and the Exome Aggregation Consortium (ExAC) for creating their exome variant database.

1150

1151 This work was supported by grants from the NIH (AR054396 and GM095941) and from the  
1152 Burroughs Wellcome Fund, the Packard Foundation, and the Sandler Family Supporting  
1153 Foundation to J.F.R. Work in the lab of H.O. was supported by the Deutsche  
1154 Forschungsgemeinschaft (OL/450-1 (H. Olbrich) and OM 6/4, OM 6/7, and OM6/8 (H. Omran),  
1155 Interdisziplinären Zentrum für Klinische Forschung Muenster grant Om2/009/12 and  
1156 Om2/015/16 (H. Omran), European Commission grant FP7/2007–2013 grant agreement (GA)  
1157 262055 (H. Omran) as a Transnational Access project of the European Sequencing and

1158 Genotyping Infrastructure, EU-FP7 programs SYSCILIA GA 241955 and BESTCILIA GA  
1159 305404 (H. Omran), the Eva Luise und Horst Köhler Stiftung and Kindness for Kids.  
1160  
1161

## 1162 **References**

- 1163 Adamska, M., Matus, D.Q., Adamski, M., Green, K., Rokhsar, D.S., Martindale, M.Q., and  
1164 Degnan, B.M. (2007). The evolutionary origin of hedgehog proteins. *Curr Biol* *17*, R836–R837.
- 1165 Afzelius, B.A. (1976). A human syndrome caused by immotile cilia. *Science* *193*, 317–319.
- 1166 Auclair, W., and Siegel, B.W. (1966). Cilia regeneration in the sea urchin embryo: evidence for a  
1167 pool of ciliary proteins. *Science* *154*, 913–915.
- 1168 Avidor-Reiss, T., Maer, A.M., Koundakjian, E., Polyanovsky, A., Keil, T., Subramaniam, S., and  
1169 Zuker, C.S. (2004). Decoding cilia function: defining specialized genes required for  
1170 compartmentalized cilia biogenesis. *Cell* *117*, 527–539.
- 1171 Babu, D., and Roy, S. (2013). Left-right asymmetry: cilia stir up new surprises in the node. *Open*  
1172 *Biology* *3*, 130052–130052.
- 1173 Bause, M., van der Horst, R., and Rentzsch, F. (2016). Glypican1/2/4/6 and sulfated  
1174 glycosaminoglycans regulate the patterning of the primary body axis in the cnidarian  
1175 *Nematostella vectensis*. *Dev Biol* *414*, 108–120.
- 1176 Becker-Heck, A., Zohn, I.E., Okabe, N., Pollock, A., Lenhart, K.B., Sullivan-Brown, J.,  
1177 McSheene, J., Loges, N.T., Olbrich, H., Haeffner, K., et al. (2011). The coiled-coil domain  
1178 containing protein CCDC40 is essential for motile cilia function and left-right axis formation.  
1179 *Nat Genet* *43*, 79–84.
- 1180 Blacque, O.E., Perens, E.A., Boroevich, K.A., Inglis, P.N., Li, C., Warner, A., Khattra, J., Holt,  
1181 R.A., Ou, G., Mah, A.K., et al. (2005). Functional genomics of the cilium, a sensory organelle.  
1182 *Curr Biol* *15*, 935–941.
- 1183 Bloodgood, R.A. (2010). Sensory reception is an attribute of both primary cilia and motile cilia.  
1184 *Journal of Cell Science* *123*, 505–509.
- 1185 Boesger, J., Wagner, V., Weisheit, W., and Mittag, M. (2009). Analysis of flagellar  
1186 phosphoproteins from *Chlamydomonas reinhardtii*. *Eukaryotic Cell* *8*, 922–932.
- 1187 Broadhead, R., Dawe, H.R., Farr, H., Griffiths, S., Hart, S.R., Portman, N., Shaw, M.K., Ginger,  
1188 M.L., Gaskell, S.J., McKean, P.G., et al. (2006). Flagellar motility is required for the viability of  
1189 the bloodstream trypanosome. *Nature* *440*, 224–227.
- 1190 Camacho, C., Coulouris, G., Avagyan, V., Ma, N., Papadopoulos, J., Bealer, K., and Madden,  
1191 T.L. (2009). BLAST+: architecture and applications. *BMC Bioinformatics* *10*, 421.
- 1192 Cao, W., Gerton, G.L., and Moss, S.B. (2006). Proteomic profiling of accessory structures from  
1193 the mouse sperm flagellum. *Mol Cell Proteomics* *5*, 801–810.
- 1194 Caparrós-Martín, J.A., Valencia, M., Reytor, E., Pacheco, M., Fernandez, M., Perez-Aytes, A.,  
1195 Gean, E., Lapunzina, P., Peters, H., Goodship, J.A., et al. (2013). The ciliary Evc/Evc2 complex  
1196 interacts with Smo and controls Hedgehog pathway activity in chondrocytes by regulating

- 1197 Sufu/Gli3 dissociation and Gli3 trafficking in primary cilia. *Hum Mol Genet* 22, 124–139.
- 1198 Carvalho-Santos, Z., Azimzadeh, J., Pereira-Leal, J.B., and Bettencourt-Dias, M. (2011).  
1199 Evolution: Tracing the origins of centrioles, cilia, and flagella. *The Journal of Cell Biology* 194,  
1200 165–175.
- 1201 Casey, J.P., Brennan, K., Scheidel, N., McGettigan, P., Lavin, P.T., Carter, S., Ennis, S., Dorkins,  
1202 H., Ghali, N., Blacque, O.E., et al. (2016). Recessive NEK9 mutation causes a lethal skeletal  
1203 dysplasia with evidence of cell cycle and ciliary defects. *Hum Mol Genet* 25, 1824–1835.
- 1204 Chávez, M., Ena, S., Van Sande, J., de Kerchove d'Exaerde, A., Schurmans, S., and Schiffmann,  
1205 S.N. (2015). Modulation of Ciliary Phosphoinositide Content Regulates Trafficking and Sonic  
1206 Hedgehog Signaling Output. *Developmental Cell* 34, 338–350.
- 1207 Chen, N., Mah, A., Blacque, O.E., Chu, J., Phgora, K., Bakhoun, M.W., Newbury, C.R.H.,  
1208 Khattra, J., Chan, S., Go, A., et al. (2006). Identification of ciliary and ciliopathy genes in  
1209 *Caenorhabditis elegans* through comparative genomics. *Genome Biol.* 7, R126.
- 1210 Chen, Y., Sasai, N., Ma, G., Yue, T., Jia, J., Briscoe, J., and Jiang, J. (2011). Sonic Hedgehog  
1211 dependent phosphorylation by CK1 $\alpha$  and GRK2 is required for ciliary accumulation and  
1212 activation of smoothed. *PLoS Biol* 9, e1001083.
- 1213 Choksi, S.P., Babu, D., Lau, D., Yu, X., and Roy, S. (2014). Systematic discovery of novel  
1214 ciliary genes through functional genomics in the zebrafish. *Development* 141, 3410–3419.
- 1215 Clauser, K.R., Baker, P., and Burlingame, A.L. (1999). Role of accurate mass measurement (+/-  
1216 10 ppm) in protein identification strategies employing MS or MS/MS and database searching.  
1217 *Anal. Chem.* 71, 2871–2882.
- 1218 Collignon, J., Varlet, I., and Robertson, E.J. (1996). Relationship between asymmetric nodal  
1219 expression and the direction of embryonic turning. *Nature* 381, 155–158.
- 1220 Dayel, M.J., Alegado, R.A., Fairclough, S.R., Levin, T.C., Nichols, S.A., McDonald, K., and  
1221 King, N. (2011). Cell differentiation and morphogenesis in the colony-forming choanoflagellate  
1222 *Salpingoeca rosetta*. *Dev Biol.*
- 1223 Delling, M., DeCaen, P.G., Doerner, J.F., Febvay, S., and Clapham, D.E. (2013). Primary cilia  
1224 are specialized calcium signalling organelles. *Nature* 504, 311–314.
- 1225 Dorn, K.V., Hughes, C.E., and Rohatgi, R. (2012). A smoothed-*evc2* complex transduces the  
1226 hedgehog signal at primary cilia. *Developmental Cell* 23, 823–835.
- 1227 Dougherty, G.W., Loges, N.T., Klinkenbusch, J.A., Olbrich, H., Pennekamp, P., Menchen, T.,  
1228 Raidt, J., Wallmeier, J., Werner, C., Westermann, C., et al. (2016). DNAH11 Localization in the  
1229 Proximal Region of Respiratory Cilia Defines Distinct Outer Dynein Arm Complexes. *Am. J.*  
1230 *Respir. Cell Mol. Biol.* 55, 213–224.
- 1231 Efimenko, E., Bubb, K., Mak, H.Y., Holzman, T., Leroux, M.R., Ruvkun, G., Thomas, J.H., and

- 1232 Swoboda, P. (2005). Analysis of *xbx* genes in *C. elegans*. *Development* *132*, 1923–1934.
- 1233 Evron, T., Philipp, M., Lu, J., Meloni, A.R., Burkhalter, M., Chen, W., and Caron, M.G. (2011).  
1234 Growth Arrest Specific 8 (Gas8) and G protein-coupled receptor kinase 2 (GRK2) cooperate in  
1235 the control of Smoothed signaling. *J Biol Chem* *286*, 27676–27686.
- 1236 Fairclough, S.R., Dayel, M.J., and King, N. (2010). Multicellular development in a  
1237 choanoflagellate. *Curr Biol* *20*, R875–R876.
- 1238 Fliegau, M., Olbrich, H., Horvath, J., Wildhaber, J.H., Zariwala, M.A., Kennedy, M., Knowles,  
1239 M.R., and Omran, H. (2005). Mislocalization of DNAH5 and DNAH9 in respiratory cells from  
1240 patients with primary ciliary dyskinesia. *Am. J. Respir. Crit. Care Med.* *171*, 1343–1349.
- 1241 Francis, R., and Lo, C. (2013). Ex vivo method for high resolution imaging of cilia motility in  
1242 rodent airway epithelia. *J Vis Exp*.
- 1243 Fritzenwanker, J.H., and Technau, U. (2002). Induction of gametogenesis in the basal cnidarian  
1244 *Nematostella vectensis*(Anthozoa). *Dev Genes Evol* *212*, 99–103.
- 1245 Garcia-Gonzalo, F.R., Phua, S.C., Roberson, E.C., Garcia, G., Abedin, M., Schurmans, S., Inoue,  
1246 T., and Reiter, J.F. (2015). Phosphoinositides Regulate Ciliary Protein Trafficking to Modulate  
1247 Hedgehog Signaling. *Developmental Cell* *34*, 400–409.
- 1248 Gießl, A., Pulvermüller, A., Trojan, P., Park, J.H., Choe, H.-W., Ernst, O.P., Hofmann, K.P., and  
1249 Wolfrum, U. (2004). Differential expression and interaction with the visual G-protein transducin  
1250 of centrin isoforms in mammalian photoreceptor cells. *J Biol Chem* *279*, 51472–51481.
- 1251 Goetz, S.C., and Anderson, K.V. (2010). The primary cilium: a signalling centre during  
1252 vertebrate development. *Nat Rev Genet* *11*, 331–344.
- 1253 Gökirmak, T., Campanale, J.P., Shipp, L.E., Moy, G.W., Tao, H., and Hamdoun, A. (2012).  
1254 Localization and substrate selectivity of sea urchin multidrug (MDR) efflux transporters. *J Biol*  
1255 *Chem* *287*, 43876–43883.
- 1256 Held, K., Voets, T., and Vriens, J. (2015). TRPM3 in temperature sensing and beyond.  
1257 *Temperature (Austin)* *2*, 201–213.
- 1258 Hildebrandt, F., Benzing, T., and Katsanis, N. (2011). Ciliopathies. *N. Engl. J. Med.* *364*, 1533–  
1259 1543.
- 1260 Hilgendorf, K.I., Johnson, C.T., and Jackson, P.K. (2016). The primary cilium as a cellular  
1261 receiver: organizing ciliary GPCR signaling. *Current Opinion in Cell Biology* *39*, 84–92.
- 1262 Hirsh, A.E., and Fraser, H.B. (2001). Protein dispensability and rate of evolution. *Nature* *411*,  
1263 1046–1049.
- 1264 Hjeij, R., Onoufriadis, A., Watson, C.M., Slagle, C.E., Klena, N.T., Dougherty, G.W.,  
1265 Kurkowiak, M., Loges, N.T., Diggle, C.P., Morante, N.F.C., et al. (2014). CCDC151 mutations



- 1266 cause primary ciliary dyskinesia by disruption of the outer dynein arm docking complex  
1267 formation. *Am. J. Hum. Genet.* *95*, 257–274.
- 1268 Ishikawa, H., Thompson, J., Yates, J.R., III, and Marshall, W.F. (2012). Proteomic Analysis of  
1269 Mammalian Primary Cilia. *Curr Biol* 1–6.
- 1270 Kastury, K., Taylor, W.E., Shen, R., Arver, S., Gutierrez, M., Fisher, C.E., Coucke, P.J., Van  
1271 Hauwe, P., Van Camp, G., and Bhasin, S. (1997). Complementary deoxyribonucleic acid cloning  
1272 and characterization of a putative human axonemal dynein light chain gene. *J. Clin. Endocrinol.*  
1273 *Metab.* *82*, 3047–3053.
- 1274 King, N., Westbrook, M.J., Young, S.L., Kuo, A., Abedin, M., Chapman, J., Fairclough, S.,  
1275 Hellsten, U., Isogai, Y., Letunic, I., et al. (2008). The genome of the choanoflagellate *Monosiga*  
1276 *brevicollis* and the origin of metazoans. *Nature* *451*, 783–788.
- 1277 King, N., Young, S.L., Abedin, M., Carr, M., and Leadbeater, B.S.C. (2009). Starting and  
1278 maintaining *Monosiga brevicollis* cultures. *Cold Spring Harb Protoc* *2009*, pdb.prot5148.
- 1279 Kott, E., Duquesnoy, P., Copin, B., Legendre, M., Dastot-Le Moal, F., Montantin, G., Jeanson,  
1280 L., Tamalet, A., Papon, J.-F., Siffroi, J.-P., et al. (2012). Loss-of-function mutations in LRRC6, a  
1281 gene essential for proper axonemal assembly of inner and outer dynein arms, cause primary  
1282 ciliary dyskinesia. *Am. J. Hum. Genet.* *91*, 958–964.
- 1283 Kuhlmann, K., Tschapek, A., Wiese, H., Eisenacher, M., Meyer, H.E., Hatt, H.H., Oeljeklaus, S.,  
1284 and Warscheid, B. (2014). The membrane proteome of sensory cilia to the depth of olfactory  
1285 receptors. *Mol Cell Proteomics* *13*, 1828–1843.
- 1286 Laurençon, A., Dubruille, R., Efimenko, E., Grenier, G., Bissett, R., Cortier, E., Rolland, V.,  
1287 Swoboda, P., and Durand, B. (2007). Identification of novel regulatory factor X (RFX) target  
1288 genes by comparative genomics in *Drosophila* species. *Genome Biol.* *8*, R195.
- 1289 LeDizet, M., and Piperno, G. (1995). The light chain p28 associates with a subset of inner dynein  
1290 arm heavy chains in *Chlamydomonas* axonemes. *Mol Biol Cell* *6*, 697–711.
- 1291 Li, J.B., Gerdes, J.M., Haycraft, C.J., Fan, Y., Teslovich, T.M., May-Simera, H., Li, H., Blacque,  
1292 O.E., Li, L., Leitch, C.C., et al. (2004). Comparative genomics identifies a flagellar and basal  
1293 body proteome that includes the BBS5 human disease gene. *Cell* *117*, 541–552.
- 1294 Li, S., Li, S., Han, Y., Tong, C., Wang, B., Chen, Y., and Jiang, J. (2016). Regulation of  
1295 Smoothed Phosphorylation and High-Level Hedgehog Signaling Activity by a Plasma  
1296 Membrane Associated Kinase. *PLoS Biol* *14*, e1002481.
- 1297 Li, Y., Calvo, S.E., Gutman, R., Liu, J.S., and Mootha, V.K. (2014). Expansion of biological  
1298 pathways based on evolutionary inference. *Cell* *158*, 213–225.
- 1299 Liu, Q., Tan, G., Levenkova, N., Li, T., Pugh, E.N., Rux, J.J., Speicher, D.W., and Pierce, E.A.  
1300 (2007). The proteome of the mouse photoreceptor sensory cilium complex. *Mol Cell Proteomics*  
1301 *6*, 1299–1317.

- 1302 Livak, K.J., and Schmittgen, T.D. (2001). Analysis of relative gene expression data using real-  
1303 time quantitative PCR and the  $2^{-(\Delta\Delta C(T))}$  Method. *Methods* 25, 402–408.
- 1304 Loges, N.T., Olbrich, H., Becker-Heck, A., Häffner, K., Heer, A., Reinhard, C., Schmidts, M.,  
1305 Kispert, A., Zariwala, M.A., Leigh, M.W., et al. (2009). Deletions and point mutations of  
1306 LRRC50 cause primary ciliary dyskinesia due to dynein arm defects. *Am. J. Hum. Genet.* 85,  
1307 883–889.
- 1308 Lowe, L.A., Supp, D.M., Sampath, K., Yokoyama, T., Wright, C.V., Potter, S.S., Overbeek, P.,  
1309 and Kuehn, M.R. (1996). Conserved left-right asymmetry of nodal expression and alterations in  
1310 murine situs inversus. *Nature* 381, 158–161.
- 1311 Lundberg, J.O., Weitzberg, E., Nordvall, S.L., Kuylensstierna, R., Lundberg, J.M., and Alving, K.  
1312 (1994). Primarily nasal origin of exhaled nitric oxide and absence in Kartagener's syndrome. *Eur.*  
1313 *Respir. J.* 7, 1501–1504.
- 1314 Malicki, J.J., and Johnson, C.A. (2016). The Cilium: Cellular Antenna and Central Processing  
1315 Unit. *Trends Cell Biol.*
- 1316 Marques, S. (2004). The activity of the Nodal antagonist Cerl-2 in the mouse node is required for  
1317 correct L/R body axis. *Genes & Development* 18, 2342–2347.
- 1318 Marszalek, J.R., Ruiz-Lozano, P., Roberts, E., Chien, K.R., and Goldstein, L.S. (1999). Situs  
1319 inversus and embryonic ciliary morphogenesis defects in mouse mutants lacking the KIF3A  
1320 subunit of kinesin-II. *Proc Natl Acad Sci USA* 96, 5043–5048.
- 1321 Mayer, U., Ungerer, N., Klimmeck, D., Warnken, U., Schnölzer, M., Frings, S., and Möhrlein, F.  
1322 (2008). Proteomic analysis of a membrane preparation from rat olfactory sensory cilia. *Chem.*  
1323 *Senses* 33, 145–162.
- 1324 McGrath, J., Somlo, S., Makova, S., Tian, X., and Brueckner, M. (2003). Two populations of  
1325 node monocilia initiate left-right asymmetry in the mouse. *Cell* 114, 61–73.
- 1326 Mellacheruvu, D., Wright, Z., Couzens, A.L., Lambert, J.-P., St-Denis, N.A., Li, T., Miteva,  
1327 Y.V., Hauri, S., Sardi, M.E., Low, T.Y., et al. (2013). The CRAPome: a contaminant repository  
1328 for affinity purification-mass spectrometry data. *Nat Methods* 10, 730–736.
- 1329 Meno, C., Ito, Y., Saijoh, Y., Matsuda, Y., Tashiro, K., Kuhara, S., and Hamada, H. (1997). Two  
1330 closely-related left-right asymmetrically expressed genes, *lefty-1* and *lefty-2*: their distinct  
1331 expression domains, chromosomal linkage and direct neuralizing activity in *Xenopus* embryos.  
1332 *Genes Cells* 2, 513–524.
- 1333 Meno, C., Saijoh, Y., Fujii, H., Ikeda, M., Yokoyama, T., Yokoyama, M., Toyoda, Y., and  
1334 Hamada, H. (1996). Left-right asymmetric expression of the TGF beta-family member *lefty* in  
1335 mouse embryos. *Nature* 381, 151–155.
- 1336 Merchant, S.S., Prochnik, S.E., Vallon, O., Harris, E.H., Karpowicz, S.J., Witman, G.B., Terry,  
1337 A., Salamov, A., Fritz-Laylin, L.K., Maréchal-Drouard, L., et al. (2007). The Chlamydomonas

- 1338 genome reveals the evolution of key animal and plant functions. *Science* *318*, 245–250.
- 1339 Merveille, A.-C., Davis, E.E., Becker-Heck, A., Legendre, M., Amirav, I., Bataille, G., Belmont,  
1340 J., Beydon, N., Billen, F., Clément, A., et al. (2011). CCDC39 is required for assembly of inner  
1341 dynein arms and the dynein regulatory complex and for normal ciliary motility in humans and  
1342 dogs. *Nat Genet* *43*, 72–78.
- 1343 Mick, D.U., Rodrigues, R.B., Leib, R.D., Adams, C.M., Chien, A.S., Gygi, S.P., and Nachury,  
1344 M.V. (2015). Proteomics of Primary Cilia by Proximity Labeling. *Developmental Cell* 1–17.
- 1345 Mitchison, H.M., Schmidts, M., Loges, N.T., Freshour, J., Dritsoula, A., Hirst, R.A.,  
1346 O'Callaghan, C., Blau, H., Dabbagh, A.I., M., Olbrich, H., et al. (2012). Mutations in axonemal  
1347 dynein assembly factor DNAAF3 cause primary ciliary dyskinesia. *Nat Genet* *44*, 381–389, S1–  
1348 S2.
- 1349 Mukhopadhyay, S., Wen, X., Ratti, N., Loktev, A., Rangell, L., Scales, S.J., and Jackson, P.K.  
1350 (2013). The ciliary G-protein-coupled receptor Gpr161 negatively regulates the Sonic hedgehog  
1351 pathway via cAMP signaling. *Cell* *152*, 210–223.
- 1352 Nakamura, T., Saito, D., Kawasumi, A., Shinohara, K., Asai, Y., Takaoka, K., Dong, F.,  
1353 Takamatsu, A., Belo, J.A., Mochizuki, A., et al. (2012). Fluid flow and interlinked feedback  
1354 loops establish left-right asymmetric decay of *Cer12* mRNA. *Nature Communications* *3*, 1322.
- 1355 Narita, K., Kozuka-Hata, H., Nonami, Y., Ao-Kondo, H., Suzuki, T., Nakamura, H., Yamakawa,  
1356 K., Oyama, M., Inoue, T., and Takeda, S. (2012). Proteomic analysis of multiple primary cilia  
1357 reveals a novel mode of ciliary development in mammals. *Biology Open*.
- 1358 Narita, K., Kawate, T., Kakinuma, N., and Takeda, S. (2010). Multiple Primary Cilia Modulate  
1359 the Fluid Transcytosis in Choroid Plexus Epithelium. *Traffic* *11*, 287–301.
- 1360 Nonaka, S., Tanaka, Y., Okada, Y., Takeda, S., Harada, A., Kanai, Y., Kido, M., and Hirokawa,  
1361 N. (1998). Randomization of left-right asymmetry due to loss of nodal cilia generating leftward  
1362 flow of extraembryonic fluid in mice lacking KIF3B motor protein. *Cell* *95*, 829–837.
- 1363 Olbrich, H., Cremers, C., Loges, N.T., Werner, C., Nielsen, K.G., Marthin, J.K., Philipsen, M.,  
1364 Wallmeier, J., Pennekamp, P., Menchen, T., et al. (2015). Loss-of-Function GAS8 Mutations  
1365 Cause Primary Ciliary Dyskinesia and Disrupt the Nexin-Dynein Regulatory Complex. *Am. J.*  
1366 *Hum. Genet.* *97*, 546–554.
- 1367 Olbrich, H., Schmidts, M., Werner, C., Onoufriadis, A., Loges, N.T., Raidt, J., Banki, N.F.,  
1368 Shoemark, A., Burgoyne, T., Turki, A.I., S., et al. (2012). Recessive HYDIN mutations cause  
1369 primary ciliary dyskinesia without randomization of left-right body asymmetry. *Am. J. Hum.*  
1370 *Genet.* *91*, 672–684.
- 1371 Omran, H., Kobayashi, D., Olbrich, H., Tsukahara, T., Loges, N.T., Hagiwara, H., Zhang, Q.,  
1372 Leblond, G., O'Toole, E., Hara, C., et al. (2008a). *Ktu*/PF13 is required for cytoplasmic pre-  
1373 assembly of axonemal dyneins. *Nature* *456*, 611–616.

- 1374 Omran, H., Kobayashi, D., Olbrich, H., Tsukahara, T., Loges, N.T., Hagiwara, H., Zhang, Q.,  
1375 Leblond, G., O'Toole, E., Hara, C., et al. (2008b). Ktu/PF13 is required for cytoplasmic pre-  
1376 assembly of axonemal dyneins. *Nature* *456*, 611–616.
- 1377 Ostrowski, L.E., Blackburn, K., Radde, K.M., Moyer, M.B., Schlatzer, D.M., Moseley, A., and  
1378 Boucher, R.C. (2002). A proteomic analysis of human cilia: identification of novel components.  
1379 *Mol Cell Proteomics* *1*, 451–465.
- 1380 Pal, K., Hwang, S.-H., Somatilaka, B., Badgandi, H., Jackson, P.K., DeFea, K., and  
1381 Mukhopadhyay, S. (2016). Smoothed determines  $\beta$ -arrestin-mediated removal of the G  
1382 protein-coupled receptor Gpr161 from the primary cilium. *The Journal of Cell Biology* *212*,  
1383 861–875.
- 1384 Pan, J., and Snell, W.J. (2000). Signal transduction during fertilization in the unicellular green  
1385 alga, *Chlamydomonas*. *Current Opinion in Microbiology* *3*, 596–602.
- 1386 Pazour, G.J., Agrin, N., Leszyk, J., and Witman, G.B. (2005). Proteomic analysis of a eukaryotic  
1387 cilium. *The Journal of Cell Biology* *170*, 103–113.
- 1388 Pennekamp, P., Karcher, C., Fischer, A., Schweickert, A., Skryabin, B., Horst, J., Blum, M., and  
1389 Dworniczak, B. (2002). The ion channel polycystin-2 is required for left-right axis determination  
1390 in mice. *Curr Biol* *12*, 938–943.
- 1391 Pincus, D., Letunic, I., Bork, P., and Lim, W.A. (2008). Evolution of the phospho-tyrosine  
1392 signaling machinery in premetazoan lineages. *Proc Natl Acad Sci USA* *105*, 9680–9684.
- 1393 Pires-daSilva, A., and Sommer, R.J. (2003). The evolution of signalling pathways in animal  
1394 development. *Nat Rev Genet* *4*, 39–49.
- 1395 Pusapati, G.V., Hughes, C.E., Dorn, K.V., Zhang, D., Sugianto, P., Aravind, L., and Rohatgi, R.  
1396 (2014). EFCAB7 and IQCE regulate hedgehog signaling by tethering the EVC-EVC2 complex  
1397 to the base of primary cilia. *Developmental Cell* *28*, 483–496.
- 1398 Raidt, J., Wallmeier, J., Hjeij, R., Onnebrink, J.G., Pennekamp, P., Loges, N.T., Olbrich, H.,  
1399 Häffner, K., Dougherty, G.W., Omran, H., et al. (2014). Ciliary beat pattern and frequency in  
1400 genetic variants of primary ciliary dyskinesia. *Eur. Respir. J.* *44*, 1579–1588.
- 1401 Ramage, H.R., Kumar, G.R., Verschueren, E., Johnson, J.R., Dollen, Von, J., Johnson, T.,  
1402 Newton, B., Shah, P., Horner, J., Krogan, N.J., et al. (2015). A combined proteomics/genomics  
1403 approach links hepatitis C virus infection with nonsense-mediated mRNA decay. *Mol. Cell* *57*,  
1404 329–340.
- 1405 Rentzsch, F., Fritzenwanker, J.H., Scholz, C.B., and Technau, U. (2008). FGF signalling controls  
1406 formation of the apical sensory organ in the cnidarian *Nematostella vectensis*. *Development* *135*,  
1407 1761–1769.
- 1408 Roosing, S., Rohrschneider, K., Beryozkin, A., Sharon, D., Weisschuh, N., Staller, J., Kohl, S.,  
1409 Zelinger, L., Peters, T.A., Neveling, K., et al. (2013). Mutations in RAB28, encoding a

- 1410 farnesylated small GTPase, are associated with autosomal-recessive cone-rod dystrophy. *Am. J.*  
1411 *Hum. Genet.* *93*, 110–117.
- 1412 Rorick, N.K., Kinoshita, A., Weirather, J.L., Peyrard-Janvid, M., de Lima, R.L.L.F., Dunnwald,  
1413 M., Shanske, A.L., Moretti-Ferreira, D., Koillinen, H., Kere, J., et al. (2011). Genomic strategy  
1414 identifies a missense mutation in WD-repeat domain 65 (WDR65) in an individual with Van der  
1415 Woude syndrome. *Am. J. Med. Genet. A* *155A*, 1314–1321.
- 1416 Ruiz-Perez, V.L., Ide, S.E., Strom, T.M., Lorenz, B., Wilson, D., Woods, K., King, L.,  
1417 Francomano, C., Freisinger, P., Spranger, S., et al. (2000). Mutations in a new gene in Ellis-van  
1418 Creveld syndrome and Weyers acrocentric dysostosis. *Nat Genet* *24*, 283–286.
- 1419 Saijoh, Y., Oki, S., Ohishi, S., and Hamada, H. (2003). Left-right patterning of the mouse lateral  
1420 plate requires nodal produced in the node. *Dev Biol* *256*, 160–172.
- 1421 Sanders, M.A., and Salisbury, J.L. (1994). Centrin plays an essential role in microtubule severing  
1422 during flagellar excision in *Chlamydomonas reinhardtii*. *Jcb* *124*, 795–805.
- 1423 Satir, P., and Christensen, S.T. (2007). Overview of structure and function of mammalian cilia.  
1424 *Annu. Rev. Physiol.* *69*, 377–400.
- 1425 Schweickert, A., Vick, P., Getwan, M., Weber, T., Schneider, I., Eberhardt, M., Beyer, T.,  
1426 Pachur, A., and Blum, M. (2010). The nodal inhibitor Coco is a critical target of leftward flow in  
1427 *Xenopus*. *Curr Biol* *20*, 738–743.
- 1428 Shah, A.S., Ben-Shahar, Y., Moninger, T.O., Kline, J.N., and Welsh, M.J. (2009). Motile cilia of  
1429 human airway epithelia are chemosensory. *Science* *325*, 1131–1134.
- 1430 Sive, H.L., Grainger, R.M., and Harland, R.M. (2000). *Early Development of Xenopus laevis: A*  
1431 *Laboratory Manual*.
- 1432 Smith, J.C., Northey, J.G.B., Garg, J., Pearlman, R.E., and Siu, K.W.M. (2005). Robust method  
1433 for proteome analysis by MS/MS using an entire translated genome: demonstration on the  
1434 ciliome of *Tetrahymena thermophila*. *J Proteome Res* *4*, 909–919.
- 1435 Solter, K.M., and Gibor, A. (1977). Evidence for role of flagella as sensory transducers in mating  
1436 of *Chlamydomonas reinhardtii*. *Nature* *265*, 444–445.
- 1437 Sonnhammer, E.L.L., and Östlund, G. (2015). InParanoid 8: orthology analysis between 273  
1438 proteomes, mostly eukaryotic. *Nucleic Acids Res.* *43*, D234–D239.
- 1439 Stephens, R.E. (1986). Isolation of embryonic cilia and sperm flagella. *Methods Cell Biol* *27*,  
1440 217–227.
- 1441 Stephens, R.E. (1995). Ciliogenesis in sea urchin embryos--a subroutine in the program of  
1442 development. *Bioessays* *17*, 331–340.
- 1443 Supp, D.M., Brueckner, M., Kuehn, M.R., Witte, D.P., Lowe, L.A., McGrath, J., Corrales, J.,

- 1444 and Potter, S.S. (1999). Targeted deletion of the ATP binding domain of left-right dynein  
1445 confirms its role in specifying development of left-right asymmetries. *Development* *126*, 5495–  
1446 5504.
- 1447 Sutton, K.A., Jungnickel, M.K., Wang, Y., Cullen, K., Lambert, S., and Florman, H.M. (2004).  
1448 Enkurin is a novel calmodulin and TRPC channel binding protein in sperm. *Dev Biol* *274*, 426–  
1449 435.
- 1450 Takeda, S., Yonekawa, Y., Tanaka, Y., Okada, Y., Nonaka, S., and Hirokawa, N. (1999). Left-  
1451 right asymmetry and kinesin superfamily protein KIF3A: new insights in determination of  
1452 laterality and mesoderm induction by *kif3A*<sup>-/-</sup> mice analysis. *Jcb* *145*, 825–836.
- 1453 Tarkar, A., Loges, N.T., Slagle, C.E., Francis, R., Dougherty, G.W., Tamayo, J.V., Shook, B.,  
1454 Cantino, M., Schwartz, D., Jahnke, C., et al. (2013). *DYX1C1* is required for axonemal dynein  
1455 assembly and ciliary motility. *Nat Genet* *45*, 995–1003.
- 1456 Thompson, G.A., Baugh, L.C., and Walker, L.F. (1974). Nonlethal deciliation of *Tetrahymena*  
1457 by a local anesthetic and its utility as a tool for studying cilia regeneration. *Jcb* *61*, 253–257.
- 1458 Tisler, M., Wetzel, F., Mantino, S., Kremnyov, S., Thumberger, T., Schweickert, A., Blum, M.,  
1459 and Vick, P. (2016). Cilia are required for asymmetric nodal induction in the sea urchin embryo.  
1460 *BMC Dev. Biol.* *16*, 28.
- 1461 Toriyama, M., Lee, C., Taylor, S.P., Duran, I., Cohn, D.H., Bruel, A.-L., Tabler, J.M., Drew, K.,  
1462 Kelly, M.R., Kim, S., et al. (2016). The ciliopathy-associated *CPLANE* proteins direct basal  
1463 body recruitment of intraflagellar transport machinery. *Nat Genet* *48*, 648–656.
- 1464 Uhlén, M., Fagerberg, L., Hallström, B.M., Lindskog, C., Oksvold, P., Mardinoglu, A.,  
1465 Sivertsson, Å., Kampf, C., Sjöstedt, E., Asplund, A., et al. (2015). Proteomics. Tissue-based map  
1466 of the human proteome. *Science* *347*, 1260419.
- 1467 van Dam, T.J., Wheway, G., Slaats, G.G., SYSCILIA Study Group, Huynen, M.A., and Giles,  
1468 R.H. (2013). The SYSCILIA gold standard (SCGSv1) of known ciliary components and its  
1469 applications within a systems biology consortium. *Cilia* *2*, 7.
- 1470 Villefranc, J.A., Amigo, J., and Lawson, N.D. (2007). Gateway compatible vectors for analysis  
1471 of gene function in the zebrafish. *Dev Dyn* *236*, 3077–3087.
- 1472 Vladar, E.K., and Brody, S.L. (2013). Analysis of ciliogenesis in primary culture mouse tracheal  
1473 epithelial cells. *Meth Enzymol* *525*, 285–309.
- 1474 Wallmeier, J., Al-Mutairi, D.A., Chen, C.-T., Loges, N.T., Pennekamp, P., Menchen, T., Ma, L.,  
1475 Shamseldin, H.E., Olbrich, H., Dougherty, G.W., et al. (2014). Mutations in *CCNO* result in  
1476 congenital mucociliary clearance disorder with reduced generation of multiple motile cilia. *Nat*  
1477 *Genet* *46*, 646–651.
- 1478 Wan, C., Borgeson, B., Phanse, S., Tu, F., Drew, K., Clark, G., Xiong, X., Kagan, O., Kwan, J.,  
1479 Bezginov, A., et al. (2015). Panorama of ancient metazoan macromolecular complexes. *Nature*



- 1480 525, 339–344.
- 1481 Wang, Q., Pan, J., and Snell, W.J. (2006). Intraflagellar transport particles participate directly in  
1482 cilium-generated signaling in *Chlamydomonas*. *Cell* *125*, 549–562.
- 1483 Warner, J.F., McCarthy, A.M., Morris, R.L., and McClay, D.R. (2013). Hedgehog signaling  
1484 requires motile cilia in the sea urchin. *Molecular Biology and Evolution*.
- 1485 Warner, J.F., Miranda, E.L., and McClay, D.R. (2016). Contribution of hedgehog signaling to  
1486 the establishment of left-right asymmetry in the sea urchin. *Dev Biol* *411*, 314–324.
- 1487 Witman, G.B. (1986). Isolation of *Chlamydomonas* flagella and flagellar axonemes. *Meth*  
1488 *Enzymol* *134*, 280–290.
- 1489 Witman, G.B., CARLSON, K., BERLINER, J., and Rosenbaum, J.L. (1972). *Chlamydomonas*  
1490 flagella. I. Isolation and electrophoretic analysis of microtubules, matrix, membranes, and  
1491 mastigonemes. *Jcb* *54*, 507–539.
- 1492 Wright, C.F., Fitzgerald, T.W., Jones, W.D., Clayton, S., McRae, J.F., van Kogelenberg, M.,  
1493 King, D.A., Ambridge, K., Barrett, D.M., Bayzetenova, T., et al. (2015). Genetic diagnosis of  
1494 developmental disorders in the DDD study: a scalable analysis of genome-wide research data.  
1495 *Lancet* *385*, 1305–1314.
- 1496 Yang, C., Chen, W., Chen, Y., and Jiang, J. (2012). Smoothed transduces Hedgehog signal by  
1497 forming a complex with Evc/Evc2. *Cell Res.* *22*, 1593–1604.
- 1498 Yang, X., Boehm, J.S., Yang, X., Salehi-Ashtiani, K., Hao, T., Shen, Y., Lubonja, R., Thomas,  
1499 S.R., Alkan, O., Bhimdi, T., et al. (2011). A public genome-scale lentiviral expression library of  
1500 human ORFs. *Nat Methods* *8*, 659–661.
- 1501 Ye, X., Song, G., Fan, M., Shi, L., Jabs, E.W., Huang, S., Guo, R., and Bian, Z. (2006). A novel  
1502 heterozygous deletion in the EVC2 gene causes Weyers acrofacial dysostosis. *Hum. Genet.* *119*,  
1503 199–205.
- 1504 Yoshida, S., Shiratori, H., Kuo, I.Y., Kawasumi, A., Shinohara, K., Nonaka, S., Asai, Y., Sasaki,  
1505 G., Belo, J.A., Sasaki, H., et al. (2012). Cilia at the Node of Mouse Embryos Sense Fluid Flow  
1506 for Left-Right Determination via Pkd2. *Science*.
- 1507 You, Y., and Brody, S.L. (2012). Culture and Differentiation of Mouse Tracheal Epithelial Cells.  
1508 In *Methods in Molecular Biology*, (Totowa, NJ: Humana Press), pp. 123–143.
- 1509 Young, S.A.M., Miyata, H., Satouh, Y., Kato, H., Nozawa, K., Isotani, A., Aitken, R.J., Baker,  
1510 M.A., and Ikawa, M. (2015). CRISPR/Cas9-Mediated Rapid Generation of Multiple Mouse  
1511 Lines Identified *Ccdc63* as Essential for Spermiogenesis. *Int J Mol Sci* *16*, 24732–24750.
- 1512

|                                | Choanoflagellate | Sea anemone      | Sea urchin         | Total |
|--------------------------------|------------------|------------------|--------------------|-------|
| number of proteins identified  | 464 <sup>a</sup> | 991 <sup>a</sup> | 2,222 <sup>a</sup> | n/a   |
| proteins with homolog in mouse | 311              | 511              | 1,012              | 1,266 |
| <i>Known cilia proteins</i>    |                  |                  |                    |       |
| SYSCILIA Gold Standard genes   | 41%              | 55%              | 69%                | n/a   |
| published cilia data sets      | 208              | 360              | 644                | 765   |
| disease genes                  | 67               | 93               | 212                | 241   |
| ciliopathy genes               | 36               | 47               | 69                 | 73    |

1513 **Table 1. Mass spectrometry data**

1514 <sup>a</sup> multiple protein isoforms encoded by single genes are present in these data

1515

1516

1517 **Figure 1. Isolation of cilia from sea urchins, sea anemones and choanoflagellates**

1518 **(A)** The phylogenetic relationship of the organisms studied in this work to other eukaryotes. **(B)**  
1519 Immunofluorescent staining of cilia, marked by  $\beta$ -tubulin or Tubulin<sup>ac</sup> (TUB<sup>ac</sup>) (green), in a sea  
1520 urchin (*Strongylocentrotus purpuratus*) gastrula embryo, a sea anemone (*Nematostella vectensis*)  
1521 planula larva, and a colony of choanoflagellate cells (*Salpingoeca rosetta*). Phalloidin staining of  
1522 the sea anemone larva demonstrates the localization of Actin (red) to the cell bodies. Phalloidin  
1523 staining of the choanoflagellate colony marks the collar of microvilli that surrounds each  
1524 flagellum. Nuclei are stained with DAPI (blue). **(C)** Lysates of isolated *S. purpuratus* embryonic  
1525 cilia, deciliated embryos, and intact embryos immunoblotted for TUB<sup>ac</sup> and Actin. Cilia are  
1526 enriched for TUB<sup>ac</sup> and have undetectable amounts of Actin, whereas deciliated embryos have  
1527 undetectable amounts of TUB<sup>ac</sup>. **(D)** Immunostaining of purified *S. purpuratus* cilia for  $\beta$ -tubulin  
1528 (green), Actin (red) and nuclei (DAPI, blue) demonstrates that the axonemes of isolated cilia  
1529 remain intact ( $\beta$ -tubulin) and confirms that no Actin or nuclei are detected in the ciliary fraction.  
1530 **(E)** Immunoblot analysis of fractions from the sucrose step gradient purification of isolated *N.*  
1531 *vectensis* cilia reveals that the 60% sucrose fractions contains TUB<sup>ac</sup>, peaking in fractions 6 and  
1532 7. **(F)** Immunostaining of fraction 7 for  $\beta$ -tubulin (green), Actin (red) and nuclei (DAPI, blue)  
1533 confirms that the sea anemone ciliary fraction is replete with cilia (TUB<sup>ac</sup>) and contains little  
1534 Actin and no detectable nuclei. **(G)** Immunoblot analysis of fractions from the sucrose step  
1535 gradient purification of *S. rosetta* components reveal that TUB<sup>ac</sup> is enriched in the 70% sucrose  
1536 step and Actin is enriched in the 50% sucrose step. **(H)** Immunostaining of fractions for  $\beta$ -  
1537 tubulin (green), Actin (red) and nuclei (DAPI, blue) confirms that cilia are enriched in the 70%  
1538 sucrose step, cell bodies identified by DAPI staining are in the 80% sucrose step and microvilli  
1539 marked by Actin are enriched in the 50% sucrose step. Scale bars, 5  $\mu$ m for all images.

1540

1541 **Figure 2. Characterization of the sea urchin ciliome**

1542 **(A)** A schematic of ciliary fractionation. Treatment of whole isolated *S. purpuratus* cilia with  
1543 detergent followed by centrifugation separates cilia into two fractions, axonemes and membrane  
1544 + matrix. **(B)** Silver stain of isolated *S. purpuratus* whole cilia, axonemes and membrane +  
1545 matrix (mem./matrix) fractions resolved by SDS-PAGE. The protein banding pattern of the  
1546 axoneme fraction differs from that of the membrane + matrix fraction. **(C)** Proteins sorted by  
1547 their membrane + matrix enrichment score (see Methods). The unique peptide count for each

1548 protein is represented in the heat map. Known axonemal proteins (*e.g.*, IFT components,  
1549 axonemal Dyneins and Tektins) are enriched in the axonemal fraction. Known ciliary membrane  
1550 and membrane-associated proteins (*e.g.*, PKD1, ARF4, RAB8A) are enriched in the membrane +  
1551 matrix fraction.

1552

### 1553 **Figure 3. Defining an evolutionarily conserved ciliome**

1554 **(A)** Venn diagram of the overlap of *S. purpuratus*, *N. vectensis* and *S. rosetta* ciliomes. The  
1555 white line encompasses the high-confidence ciliary proteins present in 2 or more ciliomes. Only  
1556 proteins that possess a mouse homolog (BLAST E value  $\leq 1e-5$ ) are included. **(B)**  
1557 Immunofluorescent staining for cilia (ARL13B, red) and candidate proteins fused to GFP (green)  
1558 expressed in IMCD3 cells. Human C4orf47-GFP localizes to cilia and cytoplasmic microtubules.  
1559 Fusions of human CSNK1D and CCDC113 with GFP predominantly co-localize with the basal  
1560 body component CEP164 (blue). For C4orf46-GFP, nuclei are stained with Hoechst (blue). Scale  
1561 bar for whole cell images, 5  $\mu\text{m}$ . Scale bar for cilia only images, 2.5  $\mu\text{m}$ . **(C)** Ten GFP-tagged  
1562 human proteins, out of 49 randomly selected proteins from the high-confidence ciliome, localize  
1563 to cilia or the ciliary base of IMCD3 cells. Immunofluorescent staining marks GFP-tagged  
1564 proteins (green), cilia are indicated by ARL13B or TUB<sup>ac</sup> (red), as indicated, and the basal body  
1565 is highlighted by CEP164 (blue). Scale bar, 2.5  $\mu\text{m}$ . **(D)** Immunofluorescent staining of human  
1566 proteins fused to GFP (green) in the *D. rerio* embryo (somite stage 6-10). Cilia are marked by  
1567 staining for TUB<sup>ac</sup> (red). Cilia from within the Kupffer's vesicle and primary cilia found outside  
1568 the Kupffer's vesicle are depicted. Scale bar, 2.5  $\mu\text{m}$ .

1569

### 1570 **Figure 4. The distribution of signal transduction components detected in ciliomes**

1571 **(A)** Select ciliome proteins display a phylogenetic profile closely reflecting the distribution of  
1572 cilia as based on CLIME analysis. Ciliated organisms are shown in black and non-ciliated  
1573 organisms are shown in grey. A blue box indicates that a homolog is present in the organism or  
1574 group of organisms represented in the phylogeny. For the complete list of ciliome proteins with  
1575 distributions overlapping with ciliation within a phylogeny of 136 organisms, see Figure S2. For  
1576 clades represented by more than one organism (*i.e.* Choanoflagellates, Budding yeast, Chytrids,  
1577 Flowering plants, Ciliates, *Plasmodium*, Trypanosomes, *Entamoeba* and Prokaryotes) a protein  
1578 was considered to be present in the clade if one or more organisms possessed the protein. **(B)**

1579 The ciliome of each organism contains diverse signal transduction components, most of which  
1580 have homologs in vertebrates and some of which have not been previously associated with cilia.  
1581 Proteins were considered orthologs if they were reciprocal best BLAST hits. The top BLAST hit  
1582 in *M. musculus* was considered a homolog of the *S. purpuratus*, *N. vectensis* and *S. rosetta* query  
1583 protein if the two proteins were not reciprocal BLAST matches (E value  $\leq 1e-5$ ).

1584

1585 **Figure 5. ENKUR is a conserved ciliary protein expressed by cells with motile cilia.**

1586 (A) Whole mount in situ hybridization for *Enkur* in *N. vectensis* embryos at various  
1587 developmental stages. *Enkur* is expressed throughout the embryo and is enriched at the aboral  
1588 pole (arrowhead) in 48 and 74 hour embryos. Scale bar, 50  $\mu\text{m}$ . (B) In situ hybridization for  
1589 *Enkur* in *S. purpuratus* embryos at mesenchyme blastula (MB), early gastrula (EG), late gastrula  
1590 (LG) and prism (PM) stages. Scale bar, 50  $\mu\text{m}$ . *Enkur* is expressed in all cells and enriched at the  
1591 apical pole in EG embryos. (C) In situ hybridization of stage 23 *X. laevis* embryo shows  
1592 expression of *Enkur* in epidermal cells. (D) qRT-PCR measurement of *Enkur* expression in  
1593 isolated adult mouse lungs, trachea and testis. Error bars represent SDs from 6 technical  
1594 replicates. Expression was validated using 2 distinct primer pairs. (E) Immunofluorescent  
1595 staining of *S. rosetta* ENKUR fused to GFP (green), cilia (TUB<sup>ac</sup>, red) and the basal body  
1596 (CEP164, blue) expressed in IMCD3 cells. Scale bar, 2.5  $\mu\text{m}$ . (F) Immunofluorescent staining of  
1597 cilia (ARL13B, red) and a fusion of *S. purpuratus* ENKUR with GFP (green) expressed in RPE-  
1598 1 cells. ENKUR-GFP localizes to cilia. Nuclei are stained with Hoechst (blue). Scale bar, 2.5  
1599  $\mu\text{m}$ . (G) A multi-ciliated epidermal cell of a stage 23 *X. laevis* embryo expressing *X. laevis*  
1600 ENKUR fused to GFP (green), membrane-red fluorescent protein (red), marking the plasma and  
1601 ciliary membranes, and Centrin 4 (CENT4)-blue fluorescent protein (BFP, blue) to mark the  
1602 basal bodies. ENKUR localizes along the length of cilia. Scale bar, 10  $\mu\text{m}$ . (H)  
1603 Immunofluorescent staining of primary cultured mouse tracheal epithelial cells for ENKUR  
1604 (green), cilia (TUB<sup>ac</sup>, red), and the basal body (CEP164, white), and imaged using structured  
1605 illumination microscopy. ENKUR localizes to mouse tracheal epithelial cilia. Scale bar for  
1606 whole cells (top and center panels), 5  $\mu\text{m}$ . Scale bar for cilia (bottom panel), 2.5  $\mu\text{m}$ . (I)  
1607 Immunoblotting for ENKUR protein in testis and trachea lysates from littermate control and  
1608 *Enkur*<sup>-/-</sup> mice. ENKUR is expressed in testis and trachea, whereas *Enkur*<sup>-/-</sup> mice do not produce  
1609 detectable ENKUR.

1610  
1611 **Figure 6. ENKUR is required for left-right axis patterning in mice.**  
1612 (A) Whole mount in situ hybridization of a stage 17 *X. laevis* embryo for *Enkur*. Ventral view of  
1613 dorsal resection of embryo. Only the posterior region of the embryo is shown. *Enkur* is expressed  
1614 in the gastrocoel roof plate (GRP). (B) Fluorescence imaging of *X. laevis* GRP cilia expressing  
1615 ENKUR-GFP (green) and CENT4-BFP (blue). CENT4-BFP marks basal bodies. Scale bar, 5  
1616  $\mu\text{m}$ . (C) In situ hybridization for *Pitx2c* of a stage 28 *X. laevis* control embryo and an *Enkur*  
1617 knockdown (KD) embryo. *Pitx2c* is expressed in the left lateral plate (arrowhead and high  
1618 magnification image) of control embryos but is absent in the *Enkur* KD embryo. (D)  
1619 Quantification of *Pitx2c* expression patterns in control and *Enkur* KD embryos. (E) In situ  
1620 hybridization of 2-4 somite stage littermate control and *Enkur*<sup>-/-</sup> mouse embryos for *Enkur*. At  
1621 this stage, *Enkur* is expressed exclusively in the node. *Enkur*<sup>-/-</sup> embryos do not express detectable  
1622 *Enkur*. Scale bar for left panel, 50 $\mu\text{m}$ . Scale bar for right panel, 25  $\mu\text{m}$ . (F) Immunofluorescence  
1623 imaging of 2-4 somite stage mouse embryos for ENKUR (green) and cilia (TUB<sup>ac</sup>, red). ENKUR  
1624 localizes to the cilia of the node and is not detectable in the cilia of *Enkur*<sup>-/-</sup> nodes. Nuclei are  
1625 stained with Hoechst (blue). Scale bar for left panels, 10  $\mu\text{m}$ . Scale bar for right 6 panels, 2.5  
1626  $\mu\text{m}$ . (G) Photographs of thoracic and abdominal organ positions. The right (R) and left (L) side  
1627 of the body are indicated. Some *Enkur*<sup>-/-</sup> mice display situs ambiguus, illustrated here by  
1628 abnormal heart apex orientation, midline liver and right-sided spleen. Some *Enkur*<sup>-/-</sup> mice display  
1629 situs inversus, a complete reversal of the left-right axis. Scale bar, 1 cm. (H) Quantification of  
1630 situs in littermate control and *Enkur*<sup>-/-</sup> mice. (I) In situ hybridization of 3-5 somite stage  
1631 littermate control and *Enkur*<sup>-/-</sup> embryos for *Lefty2*. Upper panels are rostral views. Lower panels  
1632 are caudal views. The right (R) and left (L) side of the embryo are indicated. Control embryos  
1633 exhibit *Lefty2* expression in the midline and left lateral plate mesoderm. *Enkur*<sup>-/-</sup> embryos exhibit  
1634 variable patterns of *Lefty2* expression, including expression predominantly in the right lateral  
1635 plate mesoderm (middle) or partially in the right lateral plate mesoderm (right). Scale bar, 50  
1636  $\mu\text{m}$ . (J) In situ hybridization of 3-5 somite stage littermate control and *Enkur*<sup>-/-</sup> embryos for  
1637 *Cerl2*. The right (R) and left (L) side of the embryo are indicated. Control embryos display an  
1638 enrichment of *Cerl2* expression on the right side of the node. *Enkur*<sup>-/-</sup> embryos express equal  
1639 levels of *Cerl2* on both sides of the node. Scale bar, 100  $\mu\text{m}$ . (K) Cryosectioned in situ  
1640 hybridization of 2-4 somite stage mouse embryo for *Enkur*. Top panel depicts the entire node and



1641 lower two panels depict areas indicated by white boxes. *Enkur* is expressed predominantly within  
1642 the pit cells (pc) and not the crown cells (cc) of the node. Scale bar top panel, 50  $\mu\text{m}$ . Scale bar  
1643 bottom two panels, 5  $\mu\text{m}$ .

1644

1645 **Figure 7. An inherited human *ENKUR* mutation causes situs inversus.**

1646 **(A)** A chest X-ray of OP-1605 II3. The heart is indicated with an “H”, revealing dextrocardia.

1647 The right (R) and left (L) side of the body are indicated. **(B)** Pedigree of family OP-1605. Third

1648 degree consanguineous individuals are the parents of 2 siblings, individuals II2 and II3, affected

1649 with situs inversus. **(C)** Homozygosity mapping of the mother (OP-1605 I2) and one affected

1650 individual (OP 1605-II3) identified a short homozygous region on chromosome 10 containing

1651 *ENKUR*. **(D)** Schematic of the human *ENKUR* gene. The identified 1 bp deletion, c.224-1delG,

1652 occurs in the splice acceptor of the second intron. **(E)** Sanger sequence chromatograms of the

1653 *ENKUR* intron-exon boundary of the two affected individuals, their parents and an unrelated

1654 wild type individual. The pink line identifies the position of the last nucleotide of *ENKUR* intron

1655 2 affected by the deletion. Both affected individuals are homozygous for c.2241-delG. Both

1656 parents are heterozygous for the mutation. **(F)** Immunofluorescence imaging of nasal epithelial

1657 cells from an unaffected control and two affected individuals for ENKUR (red) and cilia (TUB<sup>ac</sup>,

1658 green). Nuclei are stained with DAPI (blue). ENKUR localizes to cilia of control cells, and is

1659 missing from the cilia of affected individuals. The dotted line highlights the cell border. Scale

1660 bar for whole cells (top panel), 10  $\mu\text{m}$ . Scale bar for cilia (bottom 3 panels), 5  $\mu\text{m}$ .

1661

Figure 1

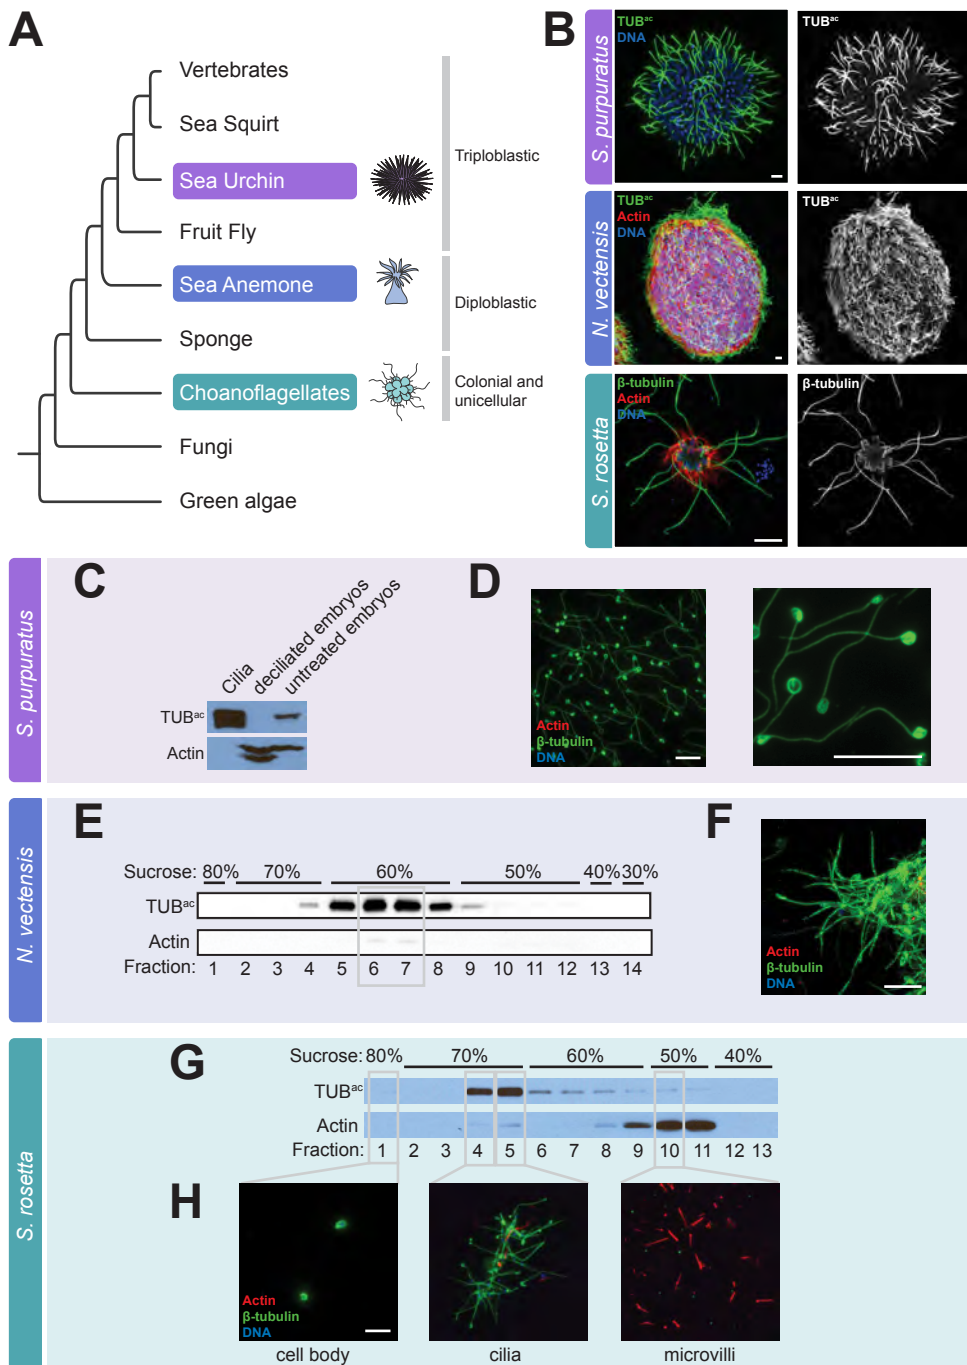

Figure 2

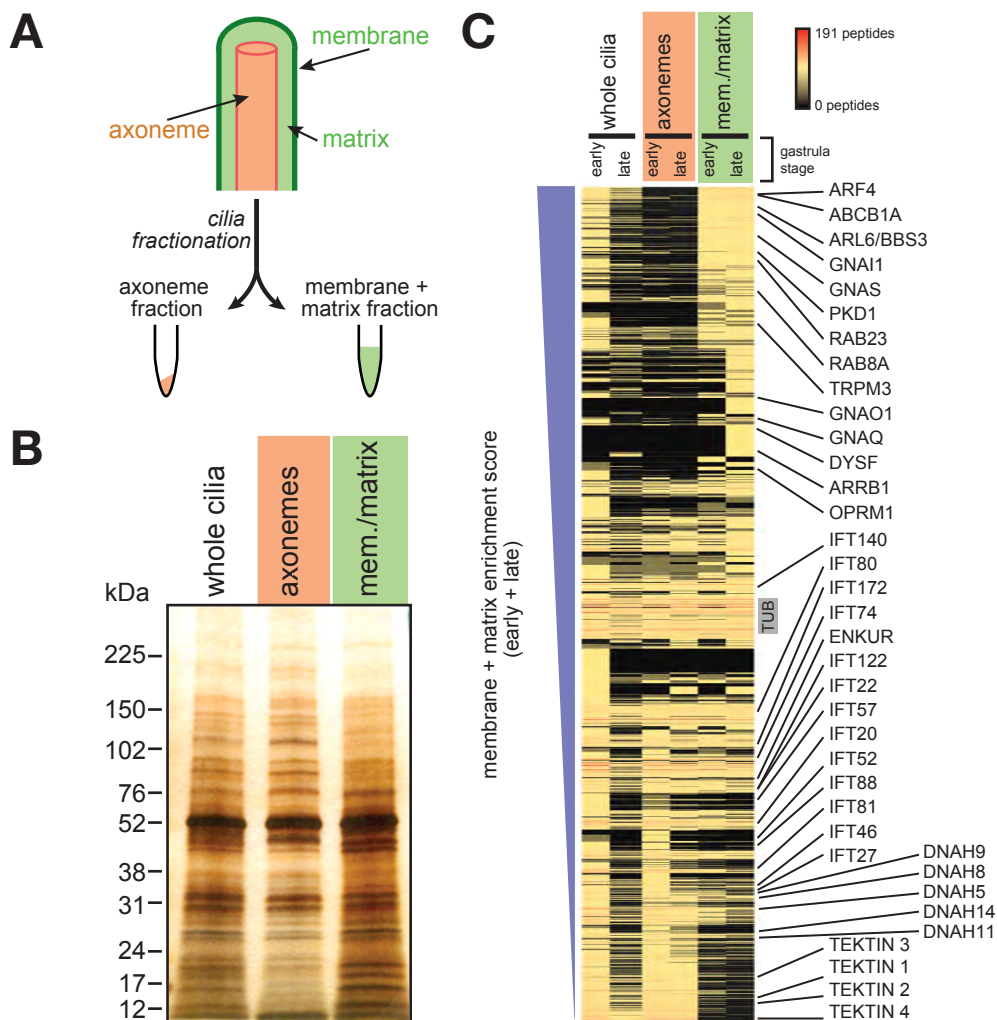

Figure 3

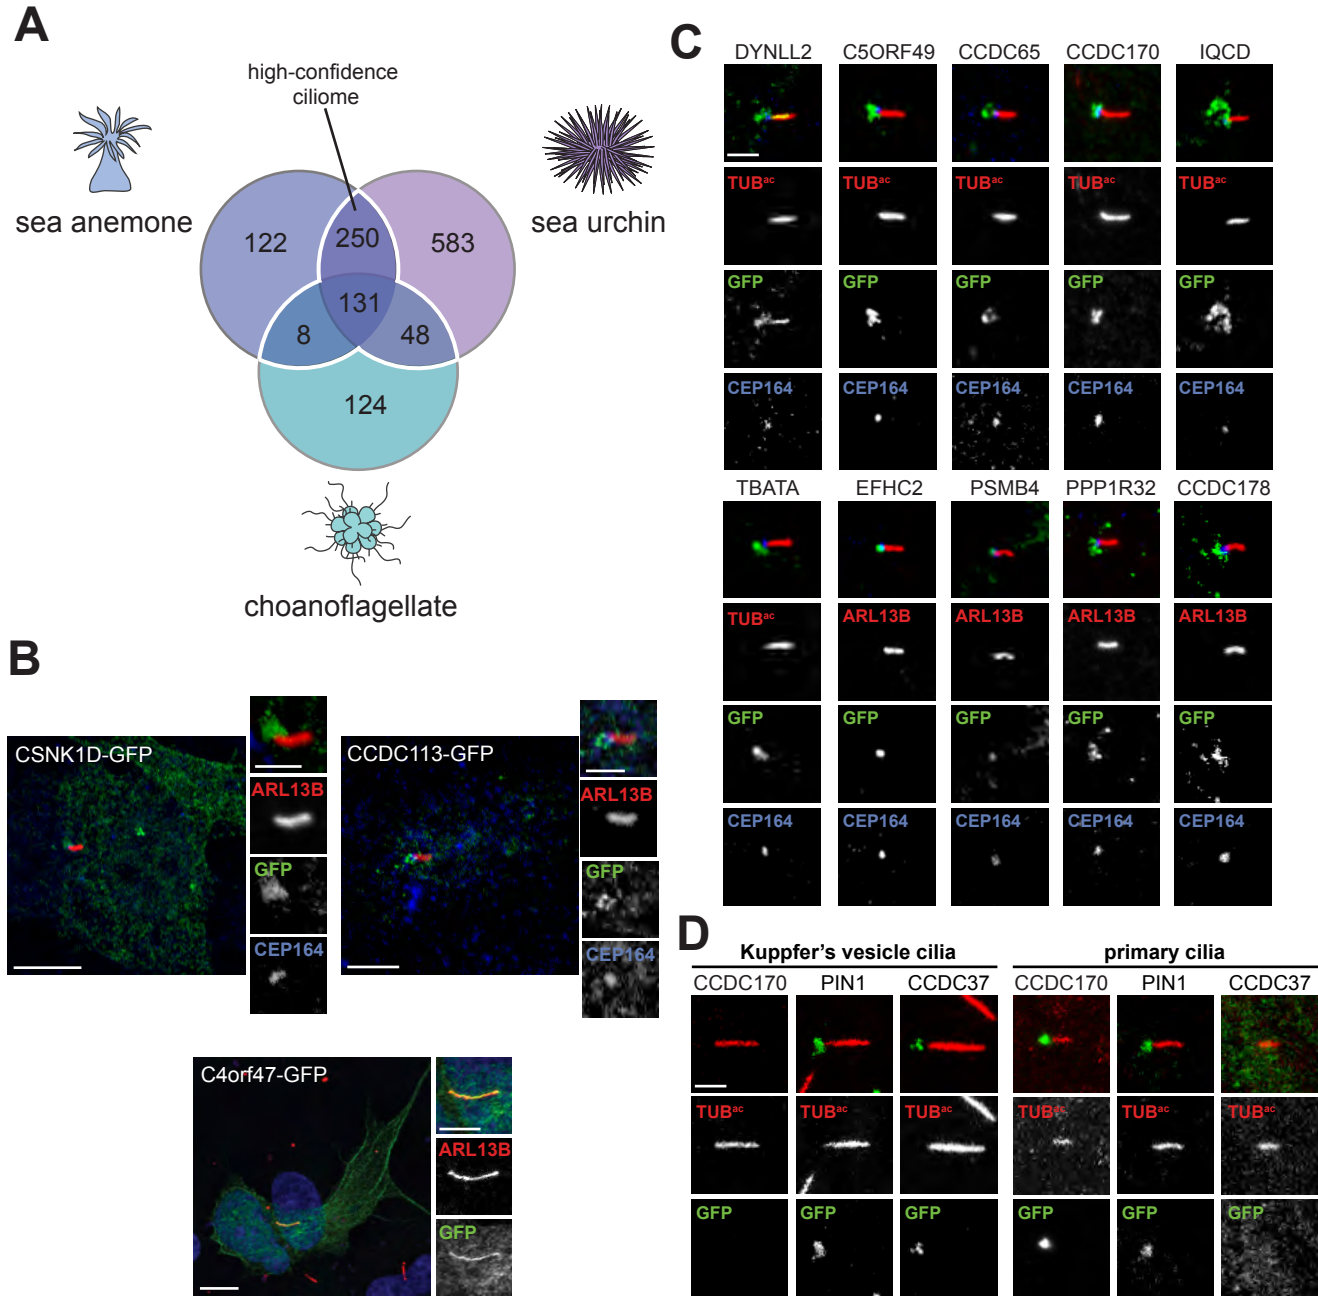

Figure 4

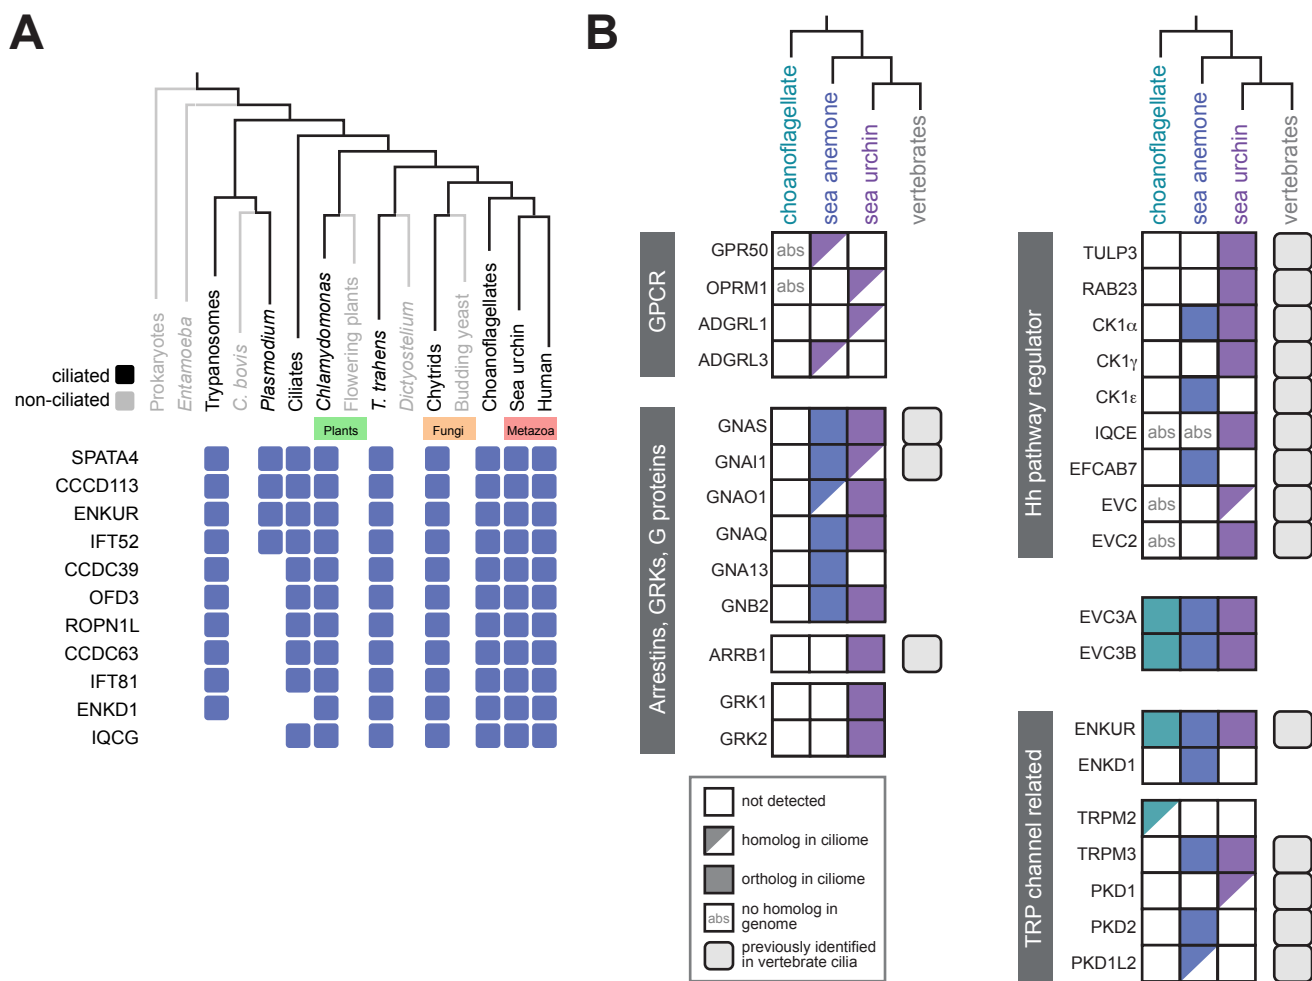

Figure 5

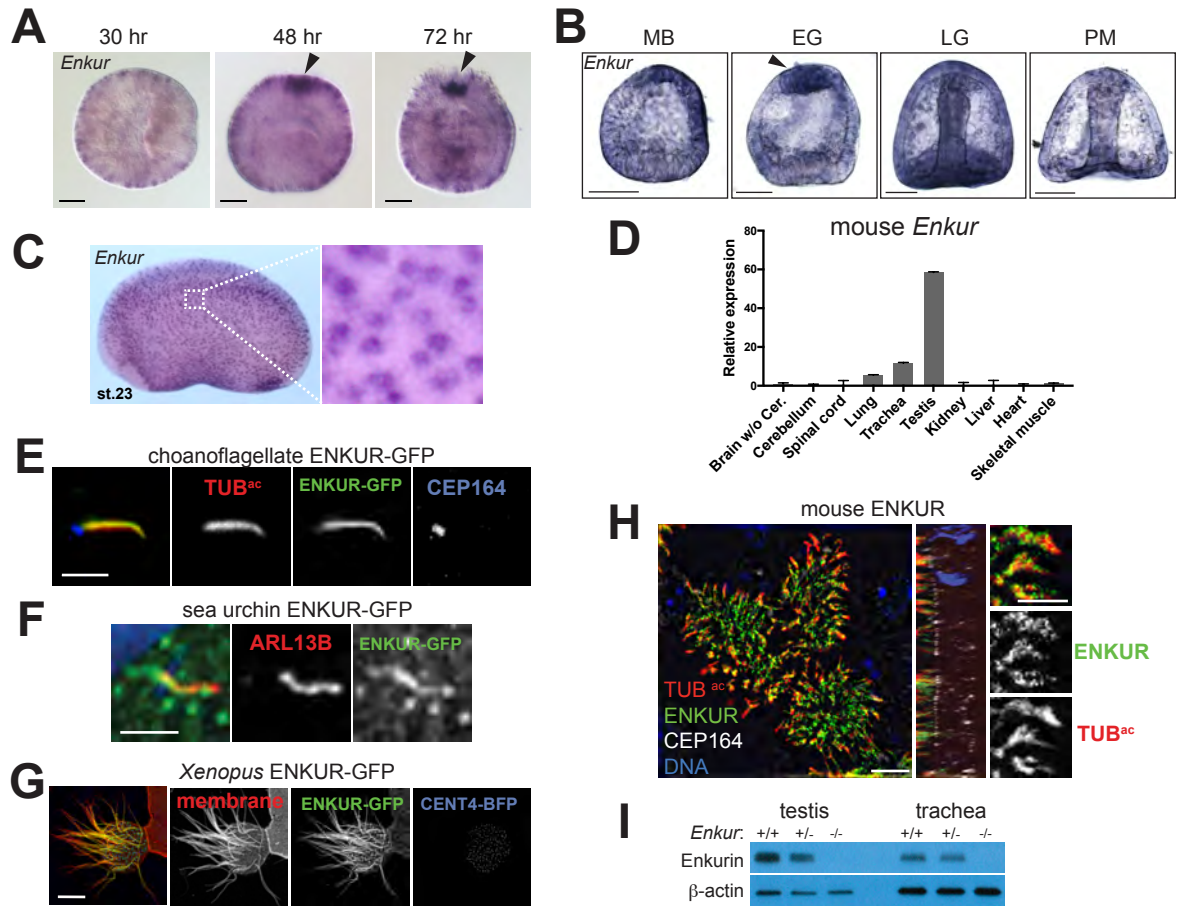





Figure 7

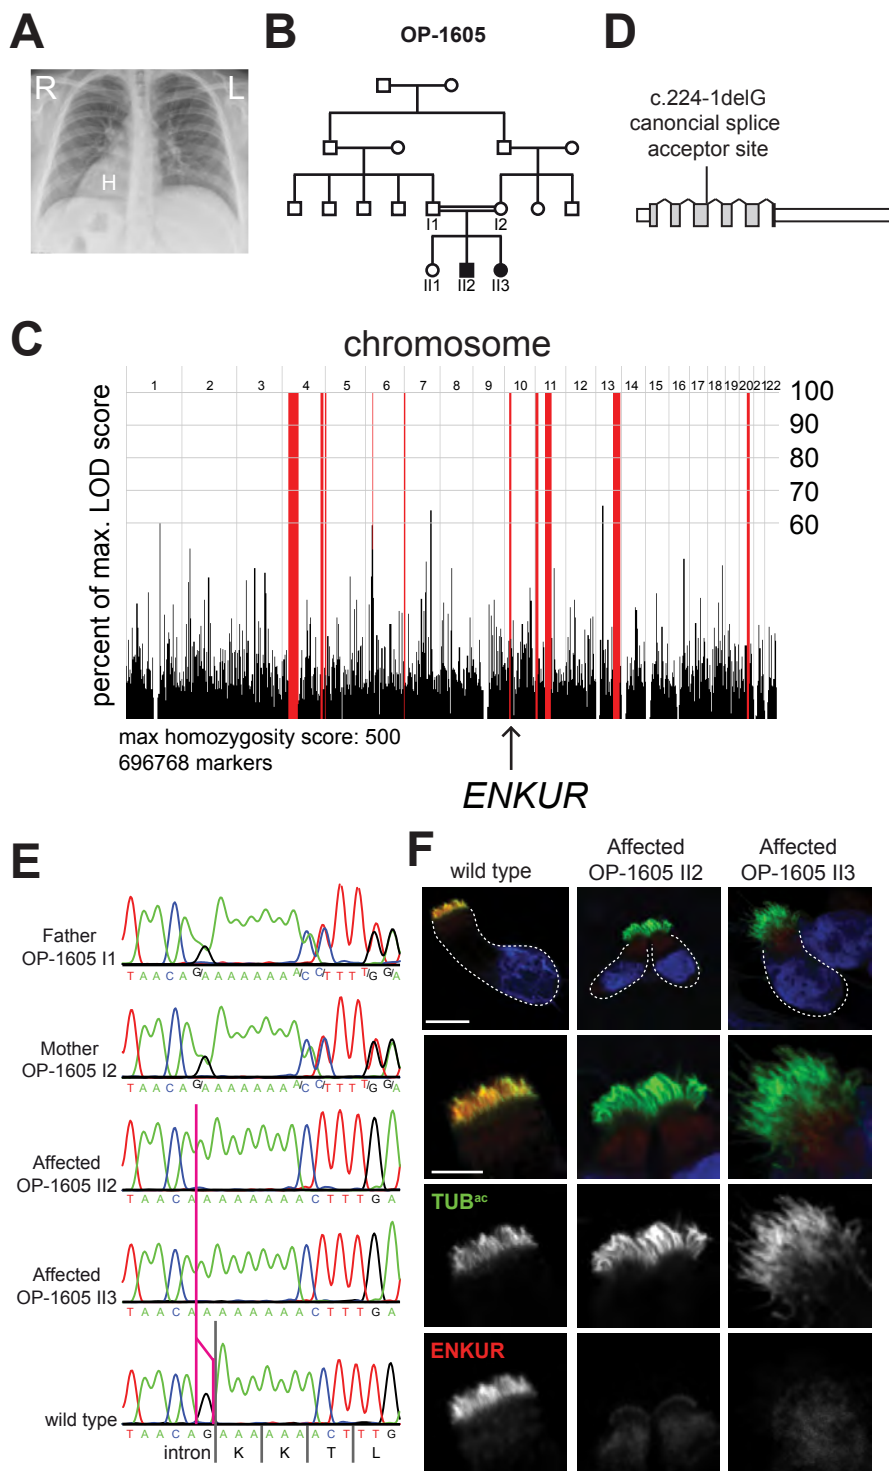

Source: https://www.biorxiv.org/content/10.1101/153437v1.full.pdf
